# Supplementary material for: Occurrence of Chlamydiaceae in Raptors and Crows in Switzerland
Source: PubMed Central journal article supplement (PMC7558692; doi:10.3390/pathogens9090724), 2020-09-02
Supplement: pathogens-09-00724-s001.pdf [file pathogens-09-00724-s001.pdf]

## Supplementary Material

**Supplementary Table S1.** Sequence length, sequence quality, first hit by nucleotide identity when compared against the NCBI database and accession number of outer membrane protein A (ompA) sequences generated in this study from nine raptors and 26 corvids from Switzerland.

| Sample Nr. | Species Name (English) | Sequence Length (bp) | Sequence Quality (%) | First Hit                          | Nucleotide Identity (%) | Accession Number |
|------------|------------------------|----------------------|----------------------|------------------------------------|-------------------------|------------------|
| 268C       | Eurasian sparrowhawk   | 1080                 | 97.0                 | <i>C. psittaci</i> Ful127          | 99.91                   | MT450242         |
| 311K       | Common kestrel         | 687                  | 93.1                 | <i>C. psittaci</i> M56             | 99.56                   | MT450243         |
| 511C       | Common buzzard         | 978                  | 67.2                 | <i>C. psittaci</i> M56             | 100                     | MT450244         |
| 556K       | Common buzzard         | 1116                 | 97.2                 | <i>C. psittaci</i> M56             | 100                     | MT450245         |
| 565C       | Carrion crow           | 1041                 | 97.5                 | <i>C. abortus</i> 15-58d44         | 99.43                   | MT450246         |
| 566C       | Common buzzard         | 1080                 | 96.3                 | <i>C. abortus</i> 15-58d44         | 99.35                   | MT450247         |
| 621C       | Rook                   | 1083                 | 97.7                 | <i>C. abortus</i> 15-58d44         | 99.26                   | MT450248         |
| 669C       | Common buzzard         | 1011                 | 98.1                 | <i>C. psittaci</i> M56             | 100                     | MT450249         |
| 671K       | Common buzzard         | 933                  | 86.4                 | <i>C. psittaci</i> M56             | 100                     | MT450250         |
| 683C       | Common buzzard         | 975                  | 71.0                 | <i>C. psittaci</i> Ful127          | 99.49                   | MT450251         |
| 688C       | Carrion crow           | 1005                 | 97.9                 | <i>C. abortus</i> 15-58d44         | 99.6                    | MT450252         |
| 689C       | Carrion crow           | 1080                 | 97.8                 | <i>C. abortus</i> 15-58d44         | 99.26                   | MT450253         |
| 690C       | Carrion crow           | 972                  | 96.8                 | <i>C. abortus</i> 15-58d44         | 99.9                    | MT450254         |
| 706C       | Carrion crow           | 912                  | 98.3                 | <i>C. psittaci</i> NJ1             | 96.83                   | MT450255         |
| 711C       | Carrion crow           | 960                  | 95.1                 | <i>C. abortus</i> 15-58d44         | 99.58                   | MT450256         |
| 716K       | Carrion crow           | 1026                 | 98.1                 | <i>C. psittaci</i> NJ1             | 97.08                   | MT450257         |
| 721C       | Carrion crow           | 957                  | 99.6                 | <i>C. abortus</i> 15-58d44         | 99.17                   | MT450258         |
| 735C       | Carrion crow           | 975                  | 99.3                 | <i>C. abortus</i> 15-58d44         | 99.39                   | MT450259         |
| 736C       | Carrion crow           | 642                  | 97.8                 | <i>C. psittaci</i><br>nier_A113.6N | 100                     | MT450260         |
| 740C       | Carrion crow           | 1008                 | 98.1                 | <i>C. abortus</i> 15-58d44         | 99.9                    | MT450261         |
| 746C       | Carrion crow           | 1026                 | 98.9                 | <i>C. abortus</i> 15-58d44         | 99.61                   | MT450262         |
| 751C       | Carrion crow           | 1038                 | 98.8                 | <i>C. abortus</i> 15-58d44         | 99.23                   | MT450263         |
| 752C       | Carrion crow           | 357                  | 82.2                 | <i>C. abortus</i> 15-58d44         | 100                     | MT450264         |
| 761C       | Carrion crow           | 954                  | 100                  | <i>C. abortus</i> 15-58d44         | 99.58                   | MT450265         |
| 772K       | Carrion crow           | 1026                 | 98.5                 | <i>C. abortus</i> 15-58d44         | 99.61                   | MT450266         |
| 798K       | Carrion crow           | 1038                 | 97.1                 | <i>C. abortus</i> 15-58d44         | 99.33                   | MT450267         |
| 814C       | Carrion crow           | 1050                 | 98.8                 | <i>C. abortus</i> 15-58d44         | 99.62                   | MT450268         |
| 826C       | Carrion crow           | 1083                 | 89.4                 | <i>C. abortus</i> 15-58d44         | 99.54                   | MT450269         |
| 848C       | Carrion crow           | 1023                 | 96.4                 | <i>C. psittaci</i> NJ1             | 97.07                   | MT450270         |
| 850K       | Carrion crow           | 966                  | 100                  | <i>C. abortus</i> 15-58d44         | 99.59                   | MT450271         |

|      |                |      |      |                            |       |          |
|------|----------------|------|------|----------------------------|-------|----------|
| 856C | Carrion crow   | 942  | 98.4 | <i>C. abortus</i> 15-58d44 | 99.43 | MT450272 |
| 858C | Carrion crow   | 966  | 98.5 | <i>C. abortus</i> 15-58d44 | 99.59 | MT450273 |
| 861K | Carrion crow   | 1065 | 98.1 | <i>C. abortus</i> 15-58d44 | 99.53 | MT450274 |
| 877K | Long-eared owl | 390  | 97.2 | <i>C. psittaci</i> M56     | 97.17 | MT450275 |
| 972C | Carrion crow   | 996  | 97.8 | <i>C. abortus</i> 15-58d44 | 99.6  | MT450276 |

**Supplementary Table S2.** Details on origin and analysis results of all swab samples collected and processed in the frame of the present study. (neg. = negative, pos. = positive, n.d. = not determined, N/A = not applicable)

| Sample | Species Name (English) | Species Name (Latin)     | Place of Origin | Canton | Material | <i>Chlamydiaceae</i> qPCR (Ø CT value) | <i>C. psittaci</i> qPCR (Ø CT value) | <i>C. buteonis</i> qPCR | Final Classification   |
|--------|------------------------|--------------------------|-----------------|--------|----------|----------------------------------------|--------------------------------------|-------------------------|------------------------|
| 8C     | Tawny owl              | <i>Strix aluco</i>       | Unknown         | LU     | Choana   | neg.                                   | n.d.                                 | n.d.                    | N/A                    |
| 8K     | Tawny owl              | <i>Strix aluco</i>       | Unknown         | LU     | Cloaca   | neg.                                   | n.d.                                 | n.d.                    | N/A                    |
| 8Kot   | Tawny owl              | <i>Strix aluco</i>       | Unknown         | LU     | Feces    | neg.                                   | n.d.                                 | n.d.                    | N/A                    |
| 11C    | Eurasian sparrowhawk   | <i>Accipiter nisus</i>   | 6028 Herlisberg | LU     | Choana   | neg.                                   | n.d.                                 | n.d.                    | N/A                    |
| 11K    | Eurasian sparrowhawk   | <i>Accipiter nisus</i>   | 6028 Herlisberg | LU     | Cloaca   | neg.                                   | n.d.                                 | n.d.                    | N/A                    |
| 12C    | Common buzzard         | <i>Buteo buteo</i>       | 6210 Sursee     | LU     | Choana   | neg.                                   | n.d.                                 | n.d.                    | N/A                    |
| 12K    | Common buzzard         | <i>Buteo buteo</i>       | 6210 Sursee     | LU     | Cloaca   | neg.                                   | n.d.                                 | n.d.                    | N/A                    |
| 13C    | Common buzzard         | <i>Buteo buteo</i>       | Unknown         | N/A    | Choana   | neg.                                   | n.d.                                 | n.d.                    | N/A                    |
| 13K    | Common buzzard         | <i>Buteo buteo</i>       | Unknown         | N/A    | Cloaca   | neg.                                   | n.d.                                 | n.d.                    | N/A                    |
| 14C    | Common buzzard         | <i>Buteo buteo</i>       | 6000 Luzern     | LU     | Choana   | pos. (32.7)                            | neg.                                 | neg.                    | <i>C. psittaci</i> M56 |
| 14K    | Common buzzard         | <i>Buteo buteo</i>       | 6000 Luzern     | LU     | Cloaca   | pos. (29.4)                            | neg.                                 | neg.                    | Not identified         |
| 15C    | Barn owl               | <i>Tyto alba</i>         | 3114 Wichtrach  | BE     | Choana   | neg.                                   | n.d.                                 | n.d.                    | N/A                    |
| 15K    | Barn owl               | <i>Tyto alba</i>         | 3114 Wichtrach  | BE     | Cloaca   | pos. (36.3)                            | neg.                                 | neg.                    | Not identified         |
| 16C    | Tawny owl              | <i>Strix aluco</i>       | 6130 Willisau   | LU     | Choana   | neg.                                   | n.d.                                 | n.d.                    | N/A                    |
| 16K    | Tawny owl              | <i>Strix aluco</i>       | 6130 Willisau   | LU     | Cloaca   | neg.                                   | n.d.                                 | n.d.                    | N/A                    |
| 17C    | Red kite               | <i>Milvus milvus</i>     | 6289 Hämikon    | LU     | Choana   | neg.                                   | n.d.                                 | n.d.                    | N/A                    |
| 17K    | Red kite               | <i>Milvus milvus</i>     | 6289 Hämikon    | LU     | Cloaca   | neg.                                   | n.d.                                 | n.d.                    | N/A                    |
| 18C    | Common kestrel         | <i>Falco tinnunculus</i> | 6246 Altishofen | LU     | Choana   | neg.                                   | n.d.                                 | n.d.                    | N/A                    |
| 18K    | Common kestrel         | <i>Falco tinnunculus</i> | 6246 Altishofen | LU     | Cloaca   | neg.                                   | n.d.                                 | n.d.                    | N/A                    |
| 19C    | Common buzzard         | <i>Buteo buteo</i>       | 6244 Nebikon    | LU     | Choana   | neg.                                   | n.d.                                 | n.d.                    | N/A                    |
| 19K    | Common buzzard         | <i>Buteo buteo</i>       | 6244 Nebikon    | LU     | Cloaca   | neg.                                   | n.d.                                 | n.d.                    | N/A                    |
| 35Kot  | Carrion crow           | <i>Corvus corone</i>     | Unknown         | N/A    | Feces    | neg.                                   | n.d.                                 | n.d.                    | N/A                    |
| 55Kot  | Eurasian magpie        | <i>Pica pica</i>         | 5727 Oberkulm   | AG     | Feces    | neg.                                   | n.d.                                 | n.d.                    | N/A                    |
| 58C    | Common buzzard         | <i>Buteo buteo</i>       | 6032 Emmen      | LU     | Choana   | neg.                                   | n.d.                                 | n.d.                    | N/A                    |
| 58K    | Common buzzard         | <i>Buteo buteo</i>       | 6032 Emmen      | LU     | Cloaca   | neg.                                   | n.d.                                 | n.d.                    | N/A                    |
| 60Kot  | Black kite             | <i>Milvus migrans</i>    | 6032 Emmen      | LU     | Feces    | neg.                                   | n.d.                                 | n.d.                    | N/A                    |
| 68C    | Red kite               | <i>Milvus milvus</i>     | 6017 Ruswil     | LU     | Choana   | neg.                                   | n.d.                                 | n.d.                    | N/A                    |
| 68K    | Red kite               | <i>Milvus milvus</i>     | 6017 Ruswil     | LU     | Cloaca   | neg.                                   | n.d.                                 | n.d.                    | N/A                    |
| 102Kot | Eurasian magpie        | <i>Pica pica</i>         | 5623 Boswil     | AG     | Feces    | neg.                                   | n.d.                                 | n.d.                    | N/A                    |

|               |                 |                            |                      |     |        |      |      |      |     |
|---------------|-----------------|----------------------------|----------------------|-----|--------|------|------|------|-----|
| <b>103Kot</b> | Eurasian magpie | <i>Pica pica</i>           | 5623 Boswil          | AG  | Feces  | neg. | n.d. | n.d. | N/A |
| <b>105Kot</b> | Carrion crow    | <i>Corvus corone</i>       | 6203 Sempach-Station | LU  | Feces  | neg. | n.d. | n.d. | N/A |
| <b>106Kot</b> | Carrion crow    | <i>Corvus corone</i>       | 6033 Buchrain        | LU  | Feces  | neg. | n.d. | n.d. | N/A |
| <b>126C</b>   | Carrion crow    | <i>Corvus corone</i>       | 6210 Sursee          | LU  | Choana | neg. | n.d. | n.d. | N/A |
| <b>126K</b>   | Carrion crow    | <i>Corvus corone</i>       | 6210 Sursee          | LU  | Cloaca | neg. | n.d. | n.d. | N/A |
| <b>132C</b>   | Long-eared owl  | <i>Asio otus</i>           | 6213 Knutwil         | LU  | Choana | neg. | n.d. | n.d. | N/A |
| <b>132K</b>   | Long-eared owl  | <i>Asio otus</i>           | 6213 Knutwil         | LU  | Cloaca | neg. | n.d. | n.d. | N/A |
| <b>160C</b>   | Eurasian jay    | <i>Garrulus glandarius</i> | 6204 Sempach         | LU  | Choana | neg. | n.d. | n.d. | N/A |
| <b>160K</b>   | Eurasian jay    | <i>Garrulus glandarius</i> | 6204 Sempach         | LU  | Cloaca | neg. | n.d. | n.d. | N/A |
| <b>160Kot</b> | Eurasian jay    | <i>Garrulus glandarius</i> | 6204 Sempach         | LU  | Feces  | neg. | n.d. | n.d. | N/A |
| <b>163C</b>   | Eurasian magpie | <i>Pica pica</i>           | 6032 Emmen           | LU  | Choana | neg. | n.d. | n.d. | N/A |
| <b>163K</b>   | Eurasian magpie | <i>Pica pica</i>           | 6032 Emmen           | LU  | Cloaca | neg. | n.d. | n.d. | N/A |
| <b>163Kot</b> | Eurasian magpie | <i>Pica pica</i>           | 6032 Emmen           | LU  | Feces  | neg. | n.d. | n.d. | N/A |
| <b>166Kot</b> | Carrion crow    | <i>Corvus corone</i>       | 6252 Dagmersellen    | LU  | Feces  | neg. | n.d. | n.d. | N/A |
| <b>167Kot</b> | Carrion crow    | <i>Corvus corone</i>       | 6216 Mauensee        | LU  | Feces  | neg. | n.d. | n.d. | N/A |
| <b>176Kot</b> | Eurasian magpie | <i>Pica pica</i>           | 8157 Oberglatt       | ZH  | Feces  | neg. | n.d. | n.d. | N/A |
| <b>178C</b>   | Carrion crow    | <i>Corvus corone</i>       | 6005 Luzern          | LU  | Choana | neg. | n.d. | n.d. | N/A |
| <b>178K</b>   | Carrion crow    | <i>Corvus corone</i>       | 6005 Luzern          | LU  | Cloaca | neg. | n.d. | n.d. | N/A |
| <b>178Kot</b> | Carrion crow    | <i>Corvus corone</i>       | 6005 Luzern          | LU  | Feces  | neg. | n.d. | n.d. | N/A |
| <b>179Kot</b> | Eurasian magpie | <i>Pica pica</i>           | 6003 Luzern          | LU  | Feces  | neg. | n.d. | n.d. | N/A |
| <b>199C</b>   | Carrion crow    | <i>Corvus corone</i>       | 6000 Luzern          | LU  | Choana | neg. | n.d. | n.d. | N/A |
| <b>199K</b>   | Carrion crow    | <i>Corvus corone</i>       | 6000 Luzern          | LU  | Cloaca | neg. | n.d. | n.d. | N/A |
| <b>209Kot</b> | Carrion crow    | <i>Corvus corone</i>       | 6206 Neuenkirch      | LU  | Feces  | neg. | n.d. | n.d. | N/A |
| <b>213C</b>   | Carrion crow    | <i>Corvus corone</i>       | 6010 Kriens          | LU  | Choana | neg. | n.d. | n.d. | N/A |
| <b>213K</b>   | Carrion crow    | <i>Corvus corone</i>       | 6010 Kriens          | LU  | Cloaca | neg. | n.d. | n.d. | N/A |
| <b>214C</b>   | Carrion crow    | <i>Corvus corone</i>       | 6010 Kriens          | LU  | Choana | neg. | n.d. | n.d. | N/A |
| <b>214K</b>   | Carrion crow    | <i>Corvus corone</i>       | 6010 Kriens          | LU  | Cloaca | neg. | n.d. | n.d. | N/A |
| <b>215C</b>   | Carrion crow    | <i>Corvus corone</i>       | 6010 Kriens          | LU  | Choana | neg. | n.d. | n.d. | N/A |
| <b>215K</b>   | Carrion crow    | <i>Corvus corone</i>       | 6010 Kriens          | LU  | Cloaca | neg. | n.d. | n.d. | N/A |
| <b>218Kot</b> | Common kestrel  | <i>Falco tinnunculus</i>   | 6294 Ermensee        | LU  | Feces  | neg. | n.d. | n.d. | N/A |
| <b>223Kot</b> | Common kestrel  | <i>Falco tinnunculus</i>   | 6289 Hämikon         | LU  | Feces  | neg. | n.d. | n.d. | N/A |
| <b>228C</b>   | Long-eared owl  | <i>Asio otus</i>           | 6280 Hochdorf        | LU  | Choana | neg. | n.d. | n.d. | N/A |
| <b>228K</b>   | Long-eared owl  | <i>Asio otus</i>           | 6280 Hochdorf        | LU  | Cloaca | neg. | n.d. | n.d. | N/A |
| <b>231Kot</b> | Long-eared owl  | <i>Asio otus</i>           | 6280 Hochdorf        | LU  | Feces  | neg. | n.d. | n.d. | N/A |
| <b>237Kot</b> | Black kite      | <i>Milvus migrans</i>      | 6017 Ruswil          | LU  | Feces  | neg. | n.d. | n.d. | N/A |
| <b>241C</b>   | Eurasian magpie | <i>Pica pica</i>           | 6036 Dierikon        | LU  | Choana | neg. | n.d. | n.d. | N/A |
| <b>241K</b>   | Eurasian magpie | <i>Pica pica</i>           | 6036 Dierikon        | LU  | Cloaca | neg. | n.d. | n.d. | N/A |
| <b>241Kot</b> | Eurasian magpie | <i>Pica pica</i>           | 6036 Dierikon        | LU  | Feces  | neg. | n.d. | n.d. | N/A |
| <b>246Kot</b> | Common kestrel  | <i>Falco tinnunculus</i>   | 6032 Emmen           | LU  | Feces  | neg. | n.d. | n.d. | N/A |
| <b>248C</b>   | Common kestrel  | <i>Falco tinnunculus</i>   | 3032 Hinterkappelen  | BE  | Choana | neg. | n.d. | n.d. | N/A |
| <b>248K</b>   | Common kestrel  | <i>Falco tinnunculus</i>   | 3032 Hinterkappelen  | BE  | Cloaca | neg. | n.d. | n.d. | N/A |
| <b>255C</b>   | Common buzzard  | <i>Buteo buteo</i>         | Unknown              | N/A | Choana | neg. | n.d. | n.d. | N/A |
| <b>255K</b>   | Common buzzard  | <i>Buteo buteo</i>         | Unknown              | N/A | Cloaca | neg. | n.d. | n.d. | N/A |

|      |                      |                          |                 |     |        |             |             |      |                      |
|------|----------------------|--------------------------|-----------------|-----|--------|-------------|-------------|------|----------------------|
| 256C | Common buzzard       | <i>Buteo buteo</i>       | Unknown         | N/A | Choana | neg.        | n.d.        | n.d. | N/A                  |
| 256K | Common buzzard       | <i>Buteo buteo</i>       | Unknown         | N/A | Cloaca | neg.        | n.d.        | n.d. | N/A                  |
| 257C | Common buzzard       | <i>Buteo buteo</i>       | Unknown         | N/A | Choana | neg.        | n.d.        | n.d. | N/A                  |
| 257K | Common buzzard       | <i>Buteo buteo</i>       | Unknown         | N/A | Cloaca | neg.        | n.d.        | n.d. | N/A                  |
| 258C | Common buzzard       | <i>Buteo buteo</i>       | Unknown         | N/A | Choana | neg.        | n.d.        | n.d. | N/A                  |
| 258K | Common buzzard       | <i>Buteo buteo</i>       | Unknown         | N/A | Cloaca | neg.        | n.d.        | n.d. | N/A                  |
| 259C | Tawny owl            | <i>Strix aluco</i>       | Unknown         | N/A | Choana | neg.        | n.d.        | n.d. | N/A                  |
| 259K | Tawny owl            | <i>Strix aluco</i>       | Unknown         | N/A | Cloaca | neg.        | n.d.        | n.d. | N/A                  |
| 260C | Long-eared owl       | <i>Asio otus</i>         | Unknown         | N/A | Choana | neg.        | n.d.        | n.d. | N/A                  |
| 260K | Long-eared owl       | <i>Asio otus</i>         | Unknown         | N/A | Cloaca | neg.        | n.d.        | n.d. | N/A                  |
| 261C | Common kestrel       | <i>Falco tinnunculus</i> | Unknown         | N/A | Choana | neg.        | n.d.        | n.d. | N/A                  |
| 261K | Common kestrel       | <i>Falco tinnunculus</i> | Unknown         | N/A | Cloaca | neg.        | n.d.        | n.d. | N/A                  |
| 262C | Eurasian sparrowhawk | <i>Accipiter nisus</i>   | Unknown         | N/A | Choana | neg.        | n.d.        | n.d. | N/A                  |
| 262K | Eurasian sparrowhawk | <i>Accipiter nisus</i>   | Unknown         | N/A | Cloaca | neg.        | n.d.        | n.d. | N/A                  |
| 263C | Common buzzard       | <i>Buteo buteo</i>       | Unknown         | N/A | Choana | neg.        | n.d.        | n.d. | N/A                  |
| 263K | Common buzzard       | <i>Buteo buteo</i>       | Unknown         | N/A | Cloaca | neg.        | n.d.        | n.d. | N/A                  |
| 264C | Eurasian hobby       | <i>Falco subbuteo</i>    | Unknown         | N/A | Choana | neg.        | n.d.        | n.d. | N/A                  |
| 264K | Eurasian hobby       | <i>Falco subbuteo</i>    | Unknown         | N/A | Cloaca | neg.        | n.d.        | n.d. | N/A                  |
| 265C | Barn owl             | <i>Tyto alba</i>         | Unknown         | N/A | Choana | neg.        | n.d.        | n.d. | N/A                  |
| 265K | Barn owl             | <i>Tyto alba</i>         | Unknown         | N/A | Cloaca | neg.        | n.d.        | n.d. | N/A                  |
| 266C | Red kite             | <i>Milvus milvus</i>     | Unknown         | N/A | Choana | neg.        | n.d.        | n.d. | N/A                  |
| 266K | Red kite             | <i>Milvus milvus</i>     | Unknown         | N/A | Cloaca | neg.        | n.d.        | n.d. | N/A                  |
| 267C | Common kestrel       | <i>Falco tinnunculus</i> | Unknown         | N/A | Choana | neg.        | n.d.        | n.d. | N/A                  |
| 267K | Common kestrel       | <i>Falco tinnunculus</i> | Unknown         | N/A | Cloaca | neg.        | n.d.        | n.d. | N/A                  |
| 268C | Eurasian sparrowhawk | <i>Accipiter nisus</i>   | Unknown         | N/A | Choana | pos. (26.3) | pos. (24.9) | neg. | <i>C. psittaci</i> A |
| 268K | Eurasian sparrowhawk | <i>Accipiter nisus</i>   | Unknown         | N/A | Cloaca | neg.        | n.d.        | n.d. | N/A                  |
| 269C | Common buzzard       | <i>Buteo buteo</i>       | Unknown         | N/A | Choana | neg.        | n.d.        | n.d. | N/A                  |
| 269K | Common buzzard       | <i>Buteo buteo</i>       | Unknown         | N/A | Cloaca | neg.        | n.d.        | n.d. | N/A                  |
| 270C | Common buzzard       | <i>Buteo buteo</i>       | Unknown         | N/A | Choana | neg.        | n.d.        | n.d. | N/A                  |
| 270K | Common buzzard       | <i>Buteo buteo</i>       | Unknown         | N/A | Cloaca | neg.        | n.d.        | n.d. | N/A                  |
| 271C | Red kite             | <i>Milvus milvus</i>     | Unknown         | N/A | Choana | neg.        | n.d.        | n.d. | N/A                  |
| 271K | Red kite             | <i>Milvus milvus</i>     | Unknown         | N/A | Cloaca | neg.        | n.d.        | n.d. | N/A                  |
| 272C | Common buzzard       | <i>Buteo buteo</i>       | Unknown         | N/A | Choana | neg.        | n.d.        | n.d. | N/A                  |
| 272K | Common buzzard       | <i>Buteo buteo</i>       | Unknown         | N/A | Cloaca | neg.        | n.d.        | n.d. | N/A                  |
| 273C | Red kite             | <i>Milvus milvus</i>     | Unknown         | N/A | Choana | neg.        | n.d.        | n.d. | N/A                  |
| 273K | Red kite             | <i>Milvus milvus</i>     | Unknown         | N/A | Cloaca | neg.        | n.d.        | n.d. | N/A                  |
| 274C | Red kite             | <i>Milvus milvus</i>     | 4566 Halten     | SO  | Choana | neg.        | n.d.        | n.d. | N/A                  |
| 274K | Red kite             | <i>Milvus milvus</i>     | 4566 Halten     | SO  | Cloaca | neg.        | n.d.        | n.d. | N/A                  |
| 275C | Eurasian sparrowhawk | <i>Accipiter nisus</i>   | 2545 Seuzach    | SO  | Choana | neg.        | n.d.        | n.d. | N/A                  |
| 275K | Eurasian sparrowhawk | <i>Accipiter nisus</i>   | 2545 Seuzach    | SO  | Cloaca | neg.        | n.d.        | n.d. | N/A                  |
| 276C | Eurasian sparrowhawk | <i>Accipiter nisus</i>   | 3000 Bern       | BE  | Choana | neg.        | n.d.        | n.d. | N/A                  |
| 276K | Eurasian sparrowhawk | <i>Accipiter nisus</i>   | 3000 Bern       | BE  | Cloaca | neg.        | n.d.        | n.d. | N/A                  |
| 277C | Eurasian sparrowhawk | <i>Accipiter nisus</i>   | 3255 Rapperswil | BE  | Choana | neg.        | n.d.        | n.d. | N/A                  |

|        |                      |                          |                   |     |        |      |      |      |     |
|--------|----------------------|--------------------------|-------------------|-----|--------|------|------|------|-----|
| 277K   | Eurasian sparrowhawk | <i>Accipiter nisus</i>   | 3255 Rapperswil   | BE  | Cloaca | neg. | n.d. | n.d. | N/A |
| 278C   | Tawny owl            | <i>Strix aluco</i>       | 4704 Wolfisberg   | BE  | Choana | neg. | n.d. | n.d. | N/A |
| 278K   | Tawny owl            | <i>Strix aluco</i>       | 4704 Wolfisberg   | BE  | Cloaca | neg. | n.d. | n.d. | N/A |
| 279C   | Tawny owl            | <i>Strix aluco</i>       | Unknown           | N/A | Choana | neg. | n.d. | n.d. | N/A |
| 279K   | Tawny owl            | <i>Strix aluco</i>       | Unknown           | N/A | Cloaca | neg. | n.d. | n.d. | N/A |
| 280C   | Tawny owl            | <i>Strix aluco</i>       | Unknown           | N/A | Choana | neg. | n.d. | n.d. | N/A |
| 280K   | Tawny owl            | <i>Strix aluco</i>       | Unknown           | N/A | Cloaca | neg. | n.d. | n.d. | N/A |
| 281C   | Tawny owl            | <i>Strix aluco</i>       | 8805 Richterswil  | ZH  | Choana | neg. | n.d. | n.d. | N/A |
| 281K   | Tawny owl            | <i>Strix aluco</i>       | 8805 Richterswil  | ZH  | Cloaca | neg. | n.d. | n.d. | N/A |
| 282C   | Barn owl             | <i>Tyto alba</i>         | Unknown           | N/A | Choana | neg. | n.d. | n.d. | N/A |
| 282K   | Barn owl             | <i>Tyto alba</i>         | Unknown           | N/A | Cloaca | neg. | n.d. | n.d. | N/A |
| 283C   | Barn owl             | <i>Tyto alba</i>         | Unknown           | N/A | Choana | neg. | n.d. | n.d. | N/A |
| 283K   | Barn owl             | <i>Tyto alba</i>         | Unknown           | N/A | Cloaca | neg. | n.d. | n.d. | N/A |
| 284C   | Barn owl             | <i>Tyto alba</i>         | 3257 Ammerzwil    | BE  | Choana | neg. | n.d. | n.d. | N/A |
| 284K   | Barn owl             | <i>Tyto alba</i>         | 3257 Ammerzwil    | BE  | Cloaca | neg. | n.d. | n.d. | N/A |
| 285C   | Long-eared owl       | <i>Asio otus</i>         | 3454 Sumiswald    | BE  | Choana | neg. | n.d. | n.d. | N/A |
| 285K   | Long-eared owl       | <i>Asio otus</i>         | 3454 Sumiswald    | BE  | Cloaca | neg. | n.d. | n.d. | N/A |
| 286C   | Barn owl             | <i>Tyto alba</i>         | 4460 Gelterkinden | BL  | Choana | neg. | n.d. | n.d. | N/A |
| 286K   | Barn owl             | <i>Tyto alba</i>         | 4460 Gelterkinden | BL  | Cloaca | neg. | n.d. | n.d. | N/A |
| 287C   | Barn owl             | <i>Tyto alba</i>         | Unknown           | N/A | Choana | neg. | n.d. | n.d. | N/A |
| 287K   | Barn owl             | <i>Tyto alba</i>         | Unknown           | N/A | Cloaca | neg. | n.d. | n.d. | N/A |
| 288C   | Long-eared owl       | <i>Asio otus</i>         | Unknown           | N/A | Choana | neg. | n.d. | n.d. | N/A |
| 288K   | Long-eared owl       | <i>Asio otus</i>         | Unknown           | N/A | Cloaca | neg. | n.d. | n.d. | N/A |
| 289C   | Barn owl             | <i>Tyto alba</i>         | Unknown           | N/A | Choana | neg. | n.d. | n.d. | N/A |
| 289K   | Barn owl             | <i>Tyto alba</i>         | Unknown           | N/A | Cloaca | neg. | n.d. | n.d. | N/A |
| 293Kot | Common kestrel       | <i>Falco tinnunculus</i> | Unknown           | N/A | Feces  | neg. | n.d. | n.d. | N/A |
| 294Kot | Common kestrel       | <i>Falco tinnunculus</i> | Unknown           | N/A | Feces  | neg. | n.d. | n.d. | N/A |
| 295Kot | Common kestrel       | <i>Falco tinnunculus</i> | Unknown           | N/A | Feces  | neg. | n.d. | n.d. | N/A |
| 296Kot | Common kestrel       | <i>Falco tinnunculus</i> | Unknown           | N/A | Feces  | neg. | n.d. | n.d. | N/A |
| 297Kot | Common buzzard       | <i>Buteo buteo</i>       | Unknown           | N/A | Feces  | neg. | n.d. | n.d. | N/A |
| 298C   | Common kestrel       | <i>Falco tinnunculus</i> | 3294 Büren a.A.   | BE  | Choana | neg. | n.d. | n.d. | N/A |
| 298K   | Common kestrel       | <i>Falco tinnunculus</i> | 3294 Büren a.A.   | BE  | Cloaca | neg. | n.d. | n.d. | N/A |
| 299C   | Common kestrel       | <i>Falco tinnunculus</i> | 4710 Balsthal     | SO  | Choana | neg. | n.d. | n.d. | N/A |
| 299K   | Common kestrel       | <i>Falco tinnunculus</i> | 4710 Balsthal     | SO  | Cloaca | neg. | n.d. | n.d. | N/A |
| 300C   | Common kestrel       | <i>Falco tinnunculus</i> | 3315 Bätterkinden | BE  | Choana | neg. | n.d. | n.d. | N/A |
| 300K   | Common kestrel       | <i>Falco tinnunculus</i> | 3315 Bätterkinden | BE  | Cloaca | neg. | n.d. | n.d. | N/A |
| 301C   | Common kestrel       | <i>Falco tinnunculus</i> | Unknown           | N/A | Choana | neg. | n.d. | n.d. | N/A |
| 301K   | Common kestrel       | <i>Falco tinnunculus</i> | Unknown           | N/A | Cloaca | neg. | n.d. | n.d. | N/A |
| 302C   | Common kestrel       | <i>Falco tinnunculus</i> | 4566 Oekingen     | SO  | Choana | neg. | n.d. | n.d. | N/A |
| 302K   | Common kestrel       | <i>Falco tinnunculus</i> | 4566 Oekingen     | SO  | Cloaca | neg. | n.d. | n.d. | N/A |
| 303C   | Common kestrel       | <i>Falco tinnunculus</i> | 3303 Jegenstorf   | BE  | Choana | neg. | n.d. | n.d. | N/A |
| 303K   | Common kestrel       | <i>Falco tinnunculus</i> | 3303 Jegenstorf   | BE  | Cloaca | neg. | n.d. | n.d. | N/A |
| 304C   | Common kestrel       | <i>Falco tinnunculus</i> | 3427 Utzenstorf   | BE  | Choana | neg. | n.d. | n.d. | N/A |

|        |                 |                          |                     |     |        |             |      |      |                        |
|--------|-----------------|--------------------------|---------------------|-----|--------|-------------|------|------|------------------------|
| 304K   | Common kestrel  | <i>Falco tinnunculus</i> | 3427 Utzenstorf     | BE  | Cloaca | neg.        | n.d. | n.d. | N/A                    |
| 305C   | Common kestrel  | <i>Falco tinnunculus</i> | Unknown             | N/A | Choana | neg.        | n.d. | n.d. | N/A                    |
| 305K   | Common kestrel  | <i>Falco tinnunculus</i> | Unknown             | N/A | Cloaca | neg.        | n.d. | n.d. | N/A                    |
| 306C   | Common kestrel  | <i>Falco tinnunculus</i> | Unknown             | N/A | Choana | neg.        | n.d. | n.d. | N/A                    |
| 306K   | Common kestrel  | <i>Falco tinnunculus</i> | Unknown             | N/A | Cloaca | neg.        | n.d. | n.d. | N/A                    |
| 307C   | Common kestrel  | <i>Falco tinnunculus</i> | 3305 Scheunen       | BE  | Choana | neg.        | n.d. | n.d. | N/A                    |
| 307K   | Common kestrel  | <i>Falco tinnunculus</i> | 3305 Scheunen       | BE  | Cloaca | neg.        | n.d. | n.d. | N/A                    |
| 308C   | Common kestrel  | <i>Falco tinnunculus</i> | 3314 Schalunen      | BE  | Choana | neg.        | n.d. | n.d. | N/A                    |
| 308K   | Common kestrel  | <i>Falco tinnunculus</i> | 3314 Schalunen      | BE  | Cloaca | neg.        | n.d. | n.d. | N/A                    |
| 309C   | Common kestrel  | <i>Falco tinnunculus</i> | Unknown             | N/A | Choana | neg.        | n.d. | n.d. | N/A                    |
| 309K   | Common kestrel  | <i>Falco tinnunculus</i> | Unknown             | N/A | Cloaca | neg.        | n.d. | n.d. | N/A                    |
| 310C   | Common kestrel  | <i>Falco tinnunculus</i> | Unknown             | N/A | Choana | neg.        | n.d. | n.d. | N/A                    |
| 310K   | Common kestrel  | <i>Falco tinnunculus</i> | Unknown             | N/A | Cloaca | neg.        | n.d. | n.d. | N/A                    |
| 311C   | Common kestrel  | <i>Falco tinnunculus</i> | Unknown             | N/A | Choana | neg.        | n.d. | n.d. | N/A                    |
| 311K   | Common kestrel  | <i>Falco tinnunculus</i> | Unknown             | N/A | Cloaca | pos. (26.8) | neg. | neg. | <i>C. psittaci</i> M56 |
| 312C   | Common kestrel  | <i>Falco tinnunculus</i> | Unknown             | N/A | Choana | neg.        | n.d. | n.d. | N/A                    |
| 312K   | Common kestrel  | <i>Falco tinnunculus</i> | Unknown             | N/A | Cloaca | neg.        | n.d. | n.d. | N/A                    |
| 313C   | Common kestrel  | <i>Falco tinnunculus</i> | Unknown             | N/A | Choana | neg.        | n.d. | n.d. | N/A                    |
| 313K   | Common kestrel  | <i>Falco tinnunculus</i> | Unknown             | N/A | Cloaca | neg.        | n.d. | n.d. | N/A                    |
| 314C   | Common kestrel  | <i>Falco tinnunculus</i> | Unknown             | N/A | Choana | neg.        | n.d. | n.d. | N/A                    |
| 314K   | Common kestrel  | <i>Falco tinnunculus</i> | Unknown             | N/A | Cloaca | neg.        | n.d. | n.d. | N/A                    |
| 315C   | Common kestrel  | <i>Falco tinnunculus</i> | 4704 Wolfisberg     | BE  | Choana | neg.        | n.d. | n.d. | N/A                    |
| 315K   | Common kestrel  | <i>Falco tinnunculus</i> | 4704 Wolfisberg     | BE  | Cloaca | neg.        | n.d. | n.d. | N/A                    |
| 316C   | Common kestrel  | <i>Falco tinnunculus</i> | Unknown             | N/A | Choana | neg.        | n.d. | n.d. | N/A                    |
| 316K   | Common kestrel  | <i>Falco tinnunculus</i> | Unknown             | N/A | Cloaca | neg.        | n.d. | n.d. | N/A                    |
| 317C   | Red kite        | <i>Milvus milvus</i>     | Unknown             | N/A | Choana | neg.        | n.d. | n.d. | N/A                    |
| 317K   | Red kite        | <i>Milvus milvus</i>     | Unknown             | N/A | Cloaca | neg.        | n.d. | n.d. | N/A                    |
| 318C   | Common buzzard  | <i>Buteo buteo</i>       | Unknown             | N/A | Choana | neg.        | n.d. | n.d. | N/A                    |
| 318K   | Common buzzard  | <i>Buteo buteo</i>       | Unknown             | N/A | Cloaca | neg.        | n.d. | n.d. | N/A                    |
| 319C   | Common buzzard  | <i>Buteo buteo</i>       | Unknown             | N/A | Choana | neg.        | n.d. | n.d. | N/A                    |
| 319K   | Common buzzard  | <i>Buteo buteo</i>       | Unknown             | N/A | Cloaca | neg.        | n.d. | n.d. | N/A                    |
| 320C   | Common buzzard  | <i>Buteo buteo</i>       | Unknown             | N/A | Choana | neg.        | n.d. | n.d. | N/A                    |
| 320K   | Common buzzard  | <i>Buteo buteo</i>       | Unknown             | N/A | Cloaca | neg.        | n.d. | n.d. | N/A                    |
| 321C   | Tawny owl       | <i>Strix aluco</i>       | Unknown             | N/A | Choana | neg.        | n.d. | n.d. | N/A                    |
| 321K   | Tawny owl       | <i>Strix aluco</i>       | Unknown             | N/A | Cloaca | neg.        | n.d. | n.d. | N/A                    |
| 323C   | Eurasian magpie | <i>Pica pica</i>         | 6234 Triengen       | LU  | Choana | neg.        | n.d. | n.d. | N/A                    |
| 323K   | Eurasian magpie | <i>Pica pica</i>         | 6234 Triengen       | LU  | Cloaca | neg.        | n.d. | n.d. | N/A                    |
| 329Kot | Common buzzard  | <i>Buteo buteo</i>       | Unknown             | N/A | Feces  | neg.        | n.d. | n.d. | N/A                    |
| 330Kot | Common kestrel  | <i>Falco tinnunculus</i> | Unknown             | N/A | Feces  | neg.        | n.d. | n.d. | N/A                    |
| 339C   | Common kestrel  | <i>Falco tinnunculus</i> | 8918 Unterlunkhofen | AG  | Choana | neg.        | n.d. | n.d. | N/A                    |
| 339K   | Common kestrel  | <i>Falco tinnunculus</i> | 8918 Unterlunkhofen | AG  | Cloaca | neg.        | n.d. | n.d. | N/A                    |
| 339Kot | Common kestrel  | <i>Falco tinnunculus</i> | 8918 Unterlunkhofen | AG  | Feces  | neg.        | n.d. | n.d. | N/A                    |
| 348C   | Carriion crow   | <i>Corvus corone</i>     | 4802 Strengelbach   | AG  | Choana | neg.        | n.d. | n.d. | N/A                    |

|        |                      |                          |                      |    |        |      |      |      |     |
|--------|----------------------|--------------------------|----------------------|----|--------|------|------|------|-----|
| 348K   | Carrion crow         | <i>Corvus corone</i>     | 4802 Strengelbach    | AG | Cloaca | neg. | n.d. | n.d. | N/A |
| 371C   | Common kestrel       | <i>Falco tinnunculus</i> | 8903 Birmensdorf     | AG | Choana | neg. | n.d. | n.d. | N/A |
| 371K   | Common kestrel       | <i>Falco tinnunculus</i> | 8903 Birmensdorf     | AG | Cloaca | neg. | n.d. | n.d. | N/A |
| 373Kot | Carrion crow         | <i>Corvus corone</i>     | 6216 Mauensee        | LU | Feces  | neg. | n.d. | n.d. | N/A |
| 377C   | Common kestrel       | <i>Falco tinnunculus</i> | 6074 Giswil          | OW | Choana | neg. | n.d. | n.d. | N/A |
| 377K   | Common kestrel       | <i>Falco tinnunculus</i> | 6074 Giswil          | OW | Cloaca | neg. | n.d. | n.d. | N/A |
| 378C   | Common buzzard       | <i>Buteo buteo</i>       | 6062 Oberwilen       | OW | Choana | neg. | n.d. | n.d. | N/A |
| 378K   | Common buzzard       | <i>Buteo buteo</i>       | 6062 Oberwilen       | OW | Cloaca | neg. | n.d. | n.d. | N/A |
| 379Kot | Eurasian hobby       | <i>Falco subbuteo</i>    | 4450 Sissach         | BL | Feces  | neg. | n.d. | n.d. | N/A |
| 381C   | Red kite             | <i>Milvus milvus</i>     | 6045 Meggen          | LU | Choana | neg. | n.d. | n.d. | N/A |
| 381K   | Red kite             | <i>Milvus milvus</i>     | 6045 Meggen          | LU | Cloaca | neg. | n.d. | n.d. | N/A |
| 382C   | Eurasian magpie      | <i>Pica pica</i>         | 6204 Sempach         | LU | Choana | neg. | n.d. | n.d. | N/A |
| 382K   | Eurasian magpie      | <i>Pica pica</i>         | 6204 Sempach         | LU | Cloaca | neg. | n.d. | n.d. | N/A |
| 383Kot | Common buzzard       | <i>Buteo buteo</i>       | 5643 Sins            | AG | Feces  | neg. | n.d. | n.d. | N/A |
| 385Kot | Red kite             | <i>Milvus milvus</i>     | 5632 Buttwil         | AG | Feces  | neg. | n.d. | n.d. | N/A |
| 388C   | Eurasian magpie      | <i>Pica pica</i>         | 6284 Sulz            | LU | Choana | neg. | n.d. | n.d. | N/A |
| 388K   | Eurasian magpie      | <i>Pica pica</i>         | 6284 Sulz            | LU | Cloaca | neg. | n.d. | n.d. | N/A |
| 388Kot | Eurasian magpie      | <i>Pica pica</i>         | 6284 Sulz            | LU | Feces  | neg. | n.d. | n.d. | N/A |
| 402C   | Black kite           | <i>Milvus migrans</i>    | 6122 Menznau         | LU | Choana | neg. | n.d. | n.d. | N/A |
| 402K   | Black kite           | <i>Milvus migrans</i>    | 6122 Menznau         | LU | Cloaca | neg. | n.d. | n.d. | N/A |
| 402Kot | Black kite           | <i>Milvus migrans</i>    | 6122 Menznau         | LU | Feces  | neg. | n.d. | n.d. | N/A |
| 412Kot | Eurasian magpie      | <i>Pica pica</i>         | 6038 Gisikon         | OW | Feces  | neg. | n.d. | n.d. | N/A |
| 425C   | Tawny owl            | <i>Strix aluco</i>       | 5728 Gontenschwil    | AG | Choana | neg. | n.d. | n.d. | N/A |
| 425K   | Tawny owl            | <i>Strix aluco</i>       | 5728 Gontenschwil    | AG | Cloaca | neg. | n.d. | n.d. | N/A |
| 425Kot | Tawny owl            | <i>Strix aluco</i>       | 5728 Gontenschwil    | AG | Feces  | neg. | n.d. | n.d. | N/A |
| 443C   | Eurasian eagle-owl   | <i>Asio otus</i>         | 6126 Daiwil          | LU | Choana | neg. | n.d. | n.d. | N/A |
| 443K   | Eurasian eagle-owl   | <i>Asio otus</i>         | 6126 Daiwil          | LU | Cloaca | neg. | n.d. | n.d. | N/A |
| 452C   | Eurasian sparrowhawk | <i>Accipiter nisus</i>   | 6476 Altdorf         | UR | Choana | neg. | n.d. | n.d. | N/A |
| 452K   | Eurasian sparrowhawk | <i>Accipiter nisus</i>   | 6476 Altdorf         | UR | Cloaca | neg. | n.d. | n.d. | N/A |
| 452Kot | Eurasian sparrowhawk | <i>Accipiter nisus</i>   | 6476 Altdorf         | UR | Feces  | neg. | n.d. | n.d. | N/A |
| 454C   | Common buzzard       | <i>Buteo buteo</i>       | 6234 Triengen        | LU | Choana | neg. | n.d. | n.d. | N/A |
| 454K   | Common buzzard       | <i>Buteo buteo</i>       | 6234 Triengen        | LU | Cloaca | neg. | n.d. | n.d. | N/A |
| 460C   | Barn owl             | <i>Tyto alba</i>         | 6203 Sempach-Station | LU | Choana | neg. | n.d. | n.d. | N/A |
| 460K   | Barn owl             | <i>Tyto alba</i>         | 6203 Sempach-Station | LU | Cloaca | neg. | n.d. | n.d. | N/A |
| 472C   | Barn owl             | <i>Tyto alba</i>         | 1678 Siviriez        | FR | Choana | neg. | n.d. | n.d. | N/A |
| 472K   | Barn owl             | <i>Tyto alba</i>         | 1678 Siviriez        | FR | Cloaca | neg. | n.d. | n.d. | N/A |
| 473C   | Red kite             | <i>Milvus milvus</i>     | 5728 Gontenschwil    | AG | Choana | neg. | n.d. | n.d. | N/A |
| 473K   | Red kite             | <i>Milvus milvus</i>     | 5728 Gontenschwil    | AG | Cloaca | neg. | n.d. | n.d. | N/A |
| 474C   | Tawny owl            | <i>Strix aluco</i>       | 6276 Hohenrain       | LU | Choana | neg. | n.d. | n.d. | N/A |
| 474K   | Tawny owl            | <i>Strix aluco</i>       | 6276 Hohenrain       | LU | Cloaca | neg. | n.d. | n.d. | N/A |
| 476C   | Black kite           | <i>Milvus migrans</i>    | 6032 Emmen           | LU | Choana | neg. | n.d. | n.d. | N/A |
| 476K   | Black kite           | <i>Milvus migrans</i>    | 6032 Emmen           | LU | Cloaca | neg. | n.d. | n.d. | N/A |
| 477C   | Barn owl             | <i>Tyto alba</i>         | 6204 Sempach         | LU | Choana | neg. | n.d. | n.d. | N/A |

|        |                      |                            |                  |     |        |             |      |      |                |
|--------|----------------------|----------------------------|------------------|-----|--------|-------------|------|------|----------------|
| 477K   | Barn owl             | <i>Tyto alba</i>           | 6204 Sempach     | LU  | Cloaca | neg.        | n.d. | n.d. | N/A            |
| 478C   | Common buzzard       | <i>Buteo buteo</i>         | 6234 Schlierbach | LU  | Choana | neg.        | n.d. | n.d. | N/A            |
| 478K   | Common buzzard       | <i>Buteo buteo</i>         | 6234 Schlierbach | LU  | Cloaca | neg.        | n.d. | n.d. | N/A            |
| 479C   | Eurasian sparrowhawk | <i>Accipiter nisus</i>     | 4805 Brittnau    | AG  | Choana | neg.        | n.d. | n.d. | N/A            |
| 479K   | Eurasian sparrowhawk | <i>Accipiter nisus</i>     | 4805 Brittnau    | AG  | Cloaca | neg.        | n.d. | n.d. | N/A            |
| 480C   | Barn owl             | <i>Tyto alba</i>           | 5645 Fenkrieden  | AG  | Choana | neg.        | n.d. | n.d. | N/A            |
| 480K   | Barn owl             | <i>Tyto alba</i>           | 5645 Fenkrieden  | AG  | Cloaca | neg.        | n.d. | n.d. | N/A            |
| 481C   | Common kestrel       | <i>Falco tinnunculus</i>   | 6023 Rothenburg  | LU  | Choana | neg.        | n.d. | n.d. | N/A            |
| 481K   | Common kestrel       | <i>Falco tinnunculus</i>   | 6023 Rothenburg  | LU  | Cloaca | neg.        | n.d. | n.d. | N/A            |
| 482C   | Common kestrel       | <i>Falco tinnunculus</i>   | 6055 Alpnach     | OW  | Choana | neg.        | n.d. | n.d. | N/A            |
| 482K   | Common kestrel       | <i>Falco tinnunculus</i>   | 6055 Alpnach     | OW  | Cloaca | neg.        | n.d. | n.d. | N/A            |
| 483C   | Montagu's harrier    | <i>Circus pygargus</i>     | 3860 Meiringen   | BE  | Choana | neg.        | n.d. | n.d. | N/A            |
| 483K   | Montagu's harrier    | <i>Circus pygargus</i>     | 3860 Meiringen   | BE  | Cloaca | neg.        | n.d. | n.d. | N/A            |
| 484C   | Eurasian sparrowhawk | <i>Accipiter nisus</i>     | 6212 St. Erhard  | LU  | Choana | neg.        | n.d. | n.d. | N/A            |
| 484K   | Eurasian sparrowhawk | <i>Accipiter nisus</i>     | 6212 St. Erhard  | LU  | Cloaca | neg.        | n.d. | n.d. | N/A            |
| 485C   | Common kestrel       | <i>Falco tinnunculus</i>   | 6205 Eich        | LU  | Choana | neg.        | n.d. | n.d. | N/A            |
| 485K   | Common kestrel       | <i>Falco tinnunculus</i>   | 6205 Eich        | LU  | Cloaca | neg.        | n.d. | n.d. | N/A            |
| 486C   | Eurasian magpie      | <i>Pica pica</i>           | 6383 Dallenwil   | NW  | Choana | neg.        | n.d. | n.d. | N/A            |
| 486K   | Eurasian magpie      | <i>Pica pica</i>           | 6383 Dallenwil   | NW  | Cloaca | neg.        | n.d. | n.d. | N/A            |
| 487Kot | Carriion crow        | <i>Corvus corone</i>       | 6032 Emmen       | LU  | Feces  | pos. (36.2) | neg. | neg. | Not identified |
| 488C   | Eurasian sparrowhawk | <i>Accipiter nisus</i>     | 6210 Sursee      | LU  | Choana | neg.        | n.d. | n.d. | N/A            |
| 488K   | Eurasian sparrowhawk | <i>Accipiter nisus</i>     | 6210 Sursee      | LU  | Cloaca | neg.        | n.d. | n.d. | N/A            |
| 489C   | Common buzzard       | <i>Buteo buteo</i>         | 6026 Rain        | LU  | Choana | neg.        | n.d. | n.d. | N/A            |
| 489K   | Common buzzard       | <i>Buteo buteo</i>         | 6026 Rain        | LU  | Cloaca | neg.        | n.d. | n.d. | N/A            |
| 490C   | Carriion crow        | <i>Corvus corone</i>       | 6014 Littau      | LU  | Choana | neg.        | n.d. | n.d. | N/A            |
| 490K   | Carriion crow        | <i>Corvus corone</i>       | 6014 Littau      | LU  | Cloaca | neg.        | n.d. | n.d. | N/A            |
| 491C   | Common buzzard       | <i>Buteo buteo</i>         | 6204 Sempach     | LU  | Choana | neg.        | n.d. | n.d. | N/A            |
| 491K   | Common buzzard       | <i>Buteo buteo</i>         | 6204 Sempach     | LU  | Cloaca | neg.        | n.d. | n.d. | N/A            |
| 492C   | Eurasian jay         | <i>Garrulus glandarius</i> | 4125 Riehen      | BL  | Choana | neg.        | n.d. | n.d. | N/A            |
| 492K   | Eurasian jay         | <i>Garrulus glandarius</i> | 4125 Riehen      | BL  | Cloaca | neg.        | n.d. | n.d. | N/A            |
| 493C   | Eurasian sparrowhawk | <i>Accipiter nisus</i>     | Unknown          | N/A | Choana | neg.        | n.d. | n.d. | N/A            |
| 493K   | Eurasian sparrowhawk | <i>Accipiter nisus</i>     | Unknown          | N/A | Cloaca | neg.        | n.d. | n.d. | N/A            |
| 494C   | Common buzzard       | <i>Buteo buteo</i>         | 8500 Frauenfeld  | TG  | Choana | neg.        | n.d. | n.d. | N/A            |
| 494K   | Common buzzard       | <i>Buteo buteo</i>         | 8500 Frauenfeld  | TG  | Cloaca | neg.        | n.d. | n.d. | N/A            |
| 495C   | Common buzzard       | <i>Buteo buteo</i>         | 8804 Wädenswil   | ZH  | Choana | neg.        | n.d. | n.d. | N/A            |
| 495K   | Common buzzard       | <i>Buteo buteo</i>         | 8804 Wädenswil   | ZH  | Cloaca | neg.        | n.d. | n.d. | N/A            |
| 496C   | Common buzzard       | <i>Buteo buteo</i>         | 8262 Ramsen      | SH  | Choana | neg.        | n.d. | n.d. | N/A            |
| 496K   | Common buzzard       | <i>Buteo buteo</i>         | 8262 Ramsen      | SH  | Cloaca | neg.        | n.d. | n.d. | N/A            |
| 497C   | Common buzzard       | <i>Buteo buteo</i>         | 8001 Zürich      | ZH  | Choana | neg.        | n.d. | n.d. | N/A            |
| 497K   | Common buzzard       | <i>Buteo buteo</i>         | 8001 Zürich      | ZH  | Cloaca | neg.        | n.d. | n.d. | N/A            |
| 498C   | Common buzzard       | <i>Buteo buteo</i>         | Unknown          | N/A | Choana | neg.        | n.d. | n.d. | N/A            |
| 498K   | Common buzzard       | <i>Buteo buteo</i>         | Unknown          | N/A | Cloaca | neg.        | n.d. | n.d. | N/A            |
| 499C   | Common buzzard       | <i>Buteo buteo</i>         | 8416 Flaach      | ZH  | Choana | neg.        | n.d. | n.d. | N/A            |



|      |                |                      |                       |     |        |             |      |      |                        |
|------|----------------|----------------------|-----------------------|-----|--------|-------------|------|------|------------------------|
| 499K | Common buzzard | <i>Buteo buteo</i>   | 8416 Flaach           | ZH  | Cloaca | neg.        | n.d. | n.d. | N/A                    |
| 500C | Common buzzard | <i>Buteo buteo</i>   | 8254 Basadingen       | TG  | Choana | neg.        | n.d. | n.d. | N/A                    |
| 500K | Common buzzard | <i>Buteo buteo</i>   | 8254 Basadingen       | TG  | Cloaca | neg.        | n.d. | n.d. | N/A                    |
| 501C | Common buzzard | <i>Buteo buteo</i>   | 8400 Winterthur       | ZH  | Choana | neg.        | n.d. | n.d. | N/A                    |
| 501K | Common buzzard | <i>Buteo buteo</i>   | 8400 Winterthur       | ZH  | Cloaca | neg.        | n.d. | n.d. | N/A                    |
| 502C | Common buzzard | <i>Buteo buteo</i>   | Unknown               | N/A | Choana | neg.        | n.d. | n.d. | N/A                    |
| 502K | Common buzzard | <i>Buteo buteo</i>   | Unknown               | N/A | Cloaca | neg.        | n.d. | n.d. | N/A                    |
| 503C | Common buzzard | <i>Buteo buteo</i>   | 6344 Meierskappel     | LU  | Choana | neg.        | n.d. | n.d. | N/A                    |
| 503K | Common buzzard | <i>Buteo buteo</i>   | 6344 Meierskappel     | LU  | Cloaca | neg.        | n.d. | n.d. | N/A                    |
| 504C | Common buzzard | <i>Buteo buteo</i>   | 6032 Emmen            | LU  | Choana | neg.        | n.d. | n.d. | N/A                    |
| 504K | Common buzzard | <i>Buteo buteo</i>   | 6032 Emmen            | LU  | Cloaca | neg.        | n.d. | n.d. | N/A                    |
| 505C | Common buzzard | <i>Buteo buteo</i>   | 5467 Fisibach         | AG  | Choana | neg.        | n.d. | n.d. | N/A                    |
| 505K | Common buzzard | <i>Buteo buteo</i>   | 5467 Fisibach         | AG  | Cloaca | neg.        | n.d. | n.d. | N/A                    |
| 506C | Common buzzard | <i>Buteo buteo</i>   | 8422 Pfungen          | ZH  | Choana | neg.        | n.d. | n.d. | N/A                    |
| 506K | Common buzzard | <i>Buteo buteo</i>   | 8422 Pfungen          | ZH  | Cloaca | neg.        | n.d. | n.d. | N/A                    |
| 507C | Common buzzard | <i>Buteo buteo</i>   | 8590 Romanshorn       | TG  | Choana | neg.        | n.d. | n.d. | N/A                    |
| 507K | Common buzzard | <i>Buteo buteo</i>   | 8590 Romanshorn       | TG  | Cloaca | neg.        | n.d. | n.d. | N/A                    |
| 508C | Common buzzard | <i>Buteo buteo</i>   | 8058 Flughafen-Zürich | ZH  | Choana | neg.        | n.d. | n.d. | N/A                    |
| 508K | Common buzzard | <i>Buteo buteo</i>   | 8058 Flughafen-Zürich | ZH  | Cloaca | neg.        | n.d. | n.d. | N/A                    |
| 509C | Common buzzard | <i>Buteo buteo</i>   | 8340 Hinwil           | ZH  | Choana | neg.        | n.d. | n.d. | N/A                    |
| 509K | Common buzzard | <i>Buteo buteo</i>   | 8340 Hinwil           | ZH  | Cloaca | neg.        | n.d. | n.d. | N/A                    |
| 510C | Common buzzard | <i>Buteo buteo</i>   | 8488 Turbenthal       | ZH  | Choana | neg.        | n.d. | n.d. | N/A                    |
| 510K | Common buzzard | <i>Buteo buteo</i>   | 8488 Turbenthal       | ZH  | Cloaca | neg.        | n.d. | n.d. | N/A                    |
| 511C | Common buzzard | <i>Buteo buteo</i>   | Unknown               | N/A | Choana | pos. (38.3) | neg. | neg. | <i>C. psittaci</i> M56 |
| 511K | Common buzzard | <i>Buteo buteo</i>   | Unknown               | N/A | Cloaca | pos. (35.2) | neg. | neg. | Not identified         |
| 512C | Common buzzard | <i>Buteo buteo</i>   | 8185 Winkel           | ZH  | Choana | neg.        | n.d. | n.d. | N/A                    |
| 512K | Common buzzard | <i>Buteo buteo</i>   | 8185 Winkel           | ZH  | Cloaca | neg.        | n.d. | n.d. | N/A                    |
| 513C | Red kite       | <i>Milvus milvus</i> | 8700 Küsnacht         | ZH  | Choana | neg.        | n.d. | n.d. | N/A                    |
| 513K | Red kite       | <i>Milvus milvus</i> | 8700 Küsnacht         | ZH  | Cloaca | neg.        | n.d. | n.d. | N/A                    |
| 514C | Common buzzard | <i>Buteo buteo</i>   | 8046 Zürich Affoltern | ZH  | Choana | neg.        | n.d. | n.d. | N/A                    |
| 514K | Common buzzard | <i>Buteo buteo</i>   | 8046 Zürich Affoltern | ZH  | Cloaca | neg.        | n.d. | n.d. | N/A                    |
| 515C | Common buzzard | <i>Buteo buteo</i>   | 8460 Marthalen        | ZH  | Choana | neg.        | n.d. | n.d. | N/A                    |
| 515K | Common buzzard | <i>Buteo buteo</i>   | 8460 Marthalen        | ZH  | Cloaca | neg.        | n.d. | n.d. | N/A                    |
| 516C | Common buzzard | <i>Buteo buteo</i>   | 8610 Uster            | ZH  | Choana | neg.        | n.d. | n.d. | N/A                    |
| 516K | Common buzzard | <i>Buteo buteo</i>   | 8610 Uster            | ZH  | Cloaca | neg.        | n.d. | n.d. | N/A                    |
| 517C | Common buzzard | <i>Buteo buteo</i>   | 8535 Herdern          | TG  | Choana | neg.        | n.d. | n.d. | N/A                    |
| 517K | Common buzzard | <i>Buteo buteo</i>   | 8535 Herdern          | TG  | Cloaca | neg.        | n.d. | n.d. | N/A                    |
| 518C | Common buzzard | <i>Buteo buteo</i>   | 8460 Marthalen        | ZH  | Choana | neg.        | n.d. | n.d. | N/A                    |
| 518K | Common buzzard | <i>Buteo buteo</i>   | 8460 Marthalen        | ZH  | Cloaca | neg.        | n.d. | n.d. | N/A                    |
| 519C | Common buzzard | <i>Buteo buteo</i>   | 9400 Rorschach        | SG  | Choana | neg.        | n.d. | n.d. | N/A                    |
| 519K | Common buzzard | <i>Buteo buteo</i>   | 9400 Rorschach        | SG  | Cloaca | neg.        | n.d. | n.d. | N/A                    |
| 520C | Common buzzard | <i>Buteo buteo</i>   | Unknown               | ZH  | Choana | neg.        | n.d. | n.d. | N/A                    |
| 520K | Common buzzard | <i>Buteo buteo</i>   | Unknown               | ZH  | Cloaca | neg.        | n.d. | n.d. | N/A                    |

|        |                      |                          |                     |    |        |      |      |      |     |
|--------|----------------------|--------------------------|---------------------|----|--------|------|------|------|-----|
| 521C   | Eurasian sparrowhawk | <i>Accipiter nisus</i>   | 8409 Winterthur     | ZH | Choana | neg. | n.d. | n.d. | N/A |
| 521K   | Eurasian sparrowhawk | <i>Accipiter nisus</i>   | 8409 Winterthur     | ZH | Cloaca | neg. | n.d. | n.d. | N/A |
| 522C   | Common buzzard       | <i>Buteo buteo</i>       | 8902 Urdorf         | ZH | Choana | neg. | n.d. | n.d. | N/A |
| 522K   | Common buzzard       | <i>Buteo buteo</i>       | 8902 Urdorf         | ZH | Cloaca | neg. | n.d. | n.d. | N/A |
| 523C   | Common buzzard       | <i>Buteo buteo</i>       | 8315 Tagelswangen   | ZH | Choana | neg. | n.d. | n.d. | N/A |
| 523K   | Common buzzard       | <i>Buteo buteo</i>       | 8315 Tagelswangen   | ZH | Cloaca | neg. | n.d. | n.d. | N/A |
| 524C   | Common kestrel       | <i>Falco tinnunculus</i> | 8196 Wil (Rafz)     | ZH | Choana | neg. | n.d. | n.d. | N/A |
| 524K   | Common kestrel       | <i>Falco tinnunculus</i> | 8196 Wil (Rafz)     | ZH | Cloaca | neg. | n.d. | n.d. | N/A |
| 525C   | Carrion crow         | <i>Corvus corone</i>     | 6174 Sörenberg      | LU | Choana | neg. | n.d. | n.d. | N/A |
| 525K   | Carrion crow         | <i>Corvus corone</i>     | 6174 Sörenberg      | LU | Cloaca | neg. | n.d. | n.d. | N/A |
| 526C   | Common buzzard       | <i>Buteo buteo</i>       | 5225 Bözberg        | AG | Choana | neg. | n.d. | n.d. | N/A |
| 526K   | Common buzzard       | <i>Buteo buteo</i>       | 5225 Bözberg        | AG | Cloaca | neg. | n.d. | n.d. | N/A |
| 527Kot | Common buzzard       | <i>Buteo buteo</i>       | 5712 Beinwil am See | AG | Feces  | neg. | n.d. | n.d. | N/A |
| 528Kot | Common buzzard       | <i>Buteo buteo</i>       | 6000 Luzern         | LU | Feces  | neg. | n.d. | n.d. | N/A |
| 529C   | Common buzzard       | <i>Buteo buteo</i>       | 6252 Dagmersellen   | LU | Choana | neg. | n.d. | n.d. | N/A |
| 529K   | Common buzzard       | <i>Buteo buteo</i>       | 6252 Dagmersellen   | LU | Cloaca | neg. | n.d. | n.d. | N/A |
| 530Kot | Common buzzard       | <i>Buteo buteo</i>       | 6204 Sempach        | LU | Feces  | neg. | n.d. | n.d. | N/A |
| 531Kot | Common buzzard       | <i>Buteo buteo</i>       | 6333 Hünenberg      | ZG | Feces  | neg. | n.d. | n.d. | N/A |
| 532C   | Common buzzard       | <i>Buteo buteo</i>       | 6025 Neudorf        | LU | Choana | neg. | n.d. | n.d. | N/A |
| 532K   | Common buzzard       | <i>Buteo buteo</i>       | 6025 Neudorf        | LU | Cloaca | neg. | n.d. | n.d. | N/A |
| 533C   | Common buzzard       | <i>Buteo buteo</i>       | 6023 Rothenburg     | LU | Choana | neg. | n.d. | n.d. | N/A |
| 533K   | Common buzzard       | <i>Buteo buteo</i>       | 6023 Rothenburg     | LU | Cloaca | neg. | n.d. | n.d. | N/A |
| 534C   | Common buzzard       | <i>Buteo buteo</i>       | 8187 Weiach         | ZH | Choana | neg. | n.d. | n.d. | N/A |
| 534K   | Common buzzard       | <i>Buteo buteo</i>       | 8187 Weiach         | ZH | Cloaca | neg. | n.d. | n.d. | N/A |
| 535C   | Common buzzard       | <i>Buteo buteo</i>       | 9548 Matzingen      | TG | Choana | neg. | n.d. | n.d. | N/A |
| 535K   | Common buzzard       | <i>Buteo buteo</i>       | 9548 Matzingen      | TG | Cloaca | neg. | n.d. | n.d. | N/A |
| 536C   | Eurasian sparrowhawk | <i>Accipiter nisus</i>   | 8570 Ottenberg      | TG | Choana | neg. | n.d. | n.d. | N/A |
| 536K   | Eurasian sparrowhawk | <i>Accipiter nisus</i>   | 8570 Ottenberg      | TG | Cloaca | neg. | n.d. | n.d. | N/A |
| 537C   | Common buzzard       | <i>Buteo buteo</i>       | 8610 Uster          | ZH | Choana | neg. | n.d. | n.d. | N/A |
| 537K   | Common buzzard       | <i>Buteo buteo</i>       | 8610 Uster          | ZH | Cloaca | neg. | n.d. | n.d. | N/A |
| 538C   | Common buzzard       | <i>Buteo buteo</i>       | 8156 Oberhasli      | ZH | Choana | neg. | n.d. | n.d. | N/A |
| 538K   | Common buzzard       | <i>Buteo buteo</i>       | 8156 Oberhasli      | ZH | Cloaca | neg. | n.d. | n.d. | N/A |
| 539C   | Common buzzard       | <i>Buteo buteo</i>       | 8253 Diessenhofen   | TG | Choana | neg. | n.d. | n.d. | N/A |
| 539K   | Common buzzard       | <i>Buteo buteo</i>       | 8253 Diessenhofen   | TG | Cloaca | neg. | n.d. | n.d. | N/A |
| 540C   | Common buzzard       | <i>Buteo buteo</i>       | 8225 Siblingen      | SH | Choana | neg. | n.d. | n.d. | N/A |
| 540K   | Common buzzard       | <i>Buteo buteo</i>       | 8225 Siblingen      | SH | Cloaca | neg. | n.d. | n.d. | N/A |
| 541C   | Common buzzard       | <i>Buteo buteo</i>       | 8400 Winterthur     | ZH | Choana | neg. | n.d. | n.d. | N/A |
| 541K   | Common buzzard       | <i>Buteo buteo</i>       | 8400 Winterthur     | ZH | Cloaca | neg. | n.d. | n.d. | N/A |
| 542C   | Common buzzard       | <i>Buteo buteo</i>       | 8226 Schleitheim    | SH | Choana | neg. | n.d. | n.d. | N/A |
| 542K   | Common buzzard       | <i>Buteo buteo</i>       | 8226 Schleitheim    | SH | Cloaca | neg. | n.d. | n.d. | N/A |
| 543C   | Common buzzard       | <i>Buteo buteo</i>       | 8185 Winkel         | ZH | Choana | neg. | n.d. | n.d. | N/A |
| 543K   | Common buzzard       | <i>Buteo buteo</i>       | 8185 Winkel         | ZH | Cloaca | neg. | n.d. | n.d. | N/A |
| 544C   | Common buzzard       | <i>Buteo buteo</i>       | 8416 Flaach         | ZH | Choana | neg. | n.d. | n.d. | N/A |

|        |                |                      |                      |     |        |             |      |      |                        |
|--------|----------------|----------------------|----------------------|-----|--------|-------------|------|------|------------------------|
| 544K   | Common buzzard | <i>Buteo buteo</i>   | 8416 Flaach          | ZH  | Cloaca | neg.        | n.d. | n.d. | N/A                    |
| 545C   | Common buzzard | <i>Buteo buteo</i>   | 5634 Merenschwand    | AG  | Choana | neg.        | n.d. | n.d. | N/A                    |
| 545K   | Common buzzard | <i>Buteo buteo</i>   | 5634 Merenschwand    | AG  | Cloaca | neg.        | n.d. | n.d. | N/A                    |
| 546C   | Common buzzard | <i>Buteo buteo</i>   | 9000 St. Gallen      | SG  | Choana | neg.        | n.d. | n.d. | N/A                    |
| 546K   | Common buzzard | <i>Buteo buteo</i>   | 9000 St. Gallen      | SG  | Cloaca | neg.        | n.d. | n.d. | N/A                    |
| 547C   | Common buzzard | <i>Buteo buteo</i>   | 8247 Thayngen        | SH  | Choana | neg.        | n.d. | n.d. | N/A                    |
| 547K   | Common buzzard | <i>Buteo buteo</i>   | 8247 Thayngen        | SH  | Cloaca | neg.        | n.d. | n.d. | N/A                    |
| 548K   | Common buzzard | <i>Buteo buteo</i>   | 8926 Kappel am Albis | ZH  | Cloaca | neg.        | n.d. | n.d. | N/A                    |
| 549C   | Common buzzard | <i>Buteo buteo</i>   | 8902 Urdorf          | ZH  | Choana | neg.        | n.d. | n.d. | N/A                    |
| 549K   | Common buzzard | <i>Buteo buteo</i>   | 8902 Urdorf          | ZH  | Cloaca | neg.        | n.d. | n.d. | N/A                    |
| 550C   | Common buzzard | <i>Buteo buteo</i>   | 8136 Gattikon        | ZH  | Choana | neg.        | n.d. | n.d. | N/A                    |
| 550K   | Common buzzard | <i>Buteo buteo</i>   | 8136 Gattikon        | ZH  | Cloaca | neg.        | n.d. | n.d. | N/A                    |
| 551C   | Common buzzard | <i>Buteo buteo</i>   | 9506 Lommis          | TG  | Choana | neg.        | n.d. | n.d. | N/A                    |
| 551K   | Common buzzard | <i>Buteo buteo</i>   | 9506 Lommis          | TG  | Cloaca | neg.        | n.d. | n.d. | N/A                    |
| 552C   | Common buzzard | <i>Buteo buteo</i>   | 8265 Mammern         | TG  | Choana | neg.        | n.d. | n.d. | N/A                    |
| 552K   | Common buzzard | <i>Buteo buteo</i>   | 8265 Mammern         | TG  | Cloaca | neg.        | n.d. | n.d. | N/A                    |
| 553C   | Red kite       | <i>Milvus milvus</i> | 8108 Dällikon        | ZH  | Choana | neg.        | n.d. | n.d. | N/A                    |
| 553K   | Red kite       | <i>Milvus milvus</i> | 8108 Dällikon        | ZH  | Cloaca | neg.        | n.d. | n.d. | N/A                    |
| 554C   | Common buzzard | <i>Buteo buteo</i>   | 5313 Klingnau        | AG  | Choana | neg.        | n.d. | n.d. | N/A                    |
| 554K   | Common buzzard | <i>Buteo buteo</i>   | 5313 Klingnau        | AG  | Cloaca | neg.        | n.d. | n.d. | N/A                    |
| 555C   | Common buzzard | <i>Buteo buteo</i>   | 8280 Kreuzlingen     | TG  | Choana | neg.        | n.d. | n.d. | N/A                    |
| 555K   | Common buzzard | <i>Buteo buteo</i>   | 8280 Kreuzlingen     | TG  | Cloaca | neg.        | n.d. | n.d. | N/A                    |
| 556C   | Common buzzard | <i>Buteo buteo</i>   | 8416 Flaach          | ZH  | Choana | pos. (30.7) | neg. | neg. | <i>C. psittaci</i> M56 |
| 556K   | Common buzzard | <i>Buteo buteo</i>   | 8416 Flaach          | ZH  | Cloaca | pos. (14.1) | neg. | neg. | <i>C. psittaci</i> M56 |
| 557C   | Common buzzard | <i>Buteo buteo</i>   | 8305 Dietikon        | ZH  | Choana | pos. (37.1) | neg. | neg. | Not identified         |
| 557K   | Common buzzard | <i>Buteo buteo</i>   | 8305 Dietikon        | ZH  | Cloaca | pos. (36.9) | neg. | neg. | Not identified         |
| 558C   | Common buzzard | <i>Buteo buteo</i>   | 8320 Fehraltdorf     | ZH  | Choana | pos. (38.8) | neg. | neg. | Not identified         |
| 558K   | Common buzzard | <i>Buteo buteo</i>   | 8320 Fehraltdorf     | ZH  | Cloaca | pos. (41.3) | neg. | neg. | Not identified         |
| 559C   | Common buzzard | <i>Buteo buteo</i>   | 8165 Oberweningen    | ZH  | Choana | neg.        | n.d. | n.d. | N/A                    |
| 559K   | Common buzzard | <i>Buteo buteo</i>   | 8165 Oberweningen    | ZH  | Cloaca | neg.        | n.d. | n.d. | N/A                    |
| 560Kot | Common buzzard | <i>Buteo buteo</i>   | 6242 Wauwil          | LU  | Feces  | neg.        | n.d. | n.d. | N/A                    |
| 561C   | Common buzzard | <i>Buteo buteo</i>   | 6016 Hellbühl        | LU  | Choana | neg.        | n.d. | n.d. | N/A                    |
| 561K   | Common buzzard | <i>Buteo buteo</i>   | 6016 Hellbühl        | LU  | Cloaca | neg.        | n.d. | n.d. | N/A                    |
| 562C   | Common buzzard | <i>Buteo buteo</i>   | Unknown              | N/A | Choana | neg.        | n.d. | n.d. | N/A                    |
| 562K   | Common buzzard | <i>Buteo buteo</i>   | Unknown              | N/A | Cloaca | neg.        | n.d. | n.d. | N/A                    |
| 562Kot | Common buzzard | <i>Buteo buteo</i>   | Unknown              | N/A | Feces  | neg.        | n.d. | n.d. | N/A                    |
| 563C   | Common buzzard | <i>Buteo buteo</i>   | 8460 Marthalen       | ZH  | Choana | neg.        | n.d. | n.d. | N/A                    |
| 563K   | Common buzzard | <i>Buteo buteo</i>   | 8460 Marthalen       | ZH  | Cloaca | neg.        | n.d. | n.d. | N/A                    |
| 564Kot | Common buzzard | <i>Buteo buteo</i>   | 6014 Littau          | LU  | Feces  | neg.        | n.d. | n.d. | N/A                    |
| 565C   | Carriion crow  | <i>Corvus corone</i> | 4800 Zofingen        | AG  | Choana | pos. (27.9) | neg. | neg. | <i>C. psittaci</i> 1V  |
| 565K   | Carriion crow  | <i>Corvus corone</i> | 4800 Zofingen        | AG  | Cloaca | neg.        | n.d. | n.d. | N/A                    |
| 565Kot | Carriion crow  | <i>Corvus corone</i> | 4800 Zofingen        | AG  | Feces  | neg.        | n.d. | n.d. | N/A                    |
| 566C   | Common buzzard | <i>Buteo buteo</i>   | 6055 Alpnach         | OW  | Choana | pos. (29.8) | neg. | neg. | <i>C. psittaci</i> 1V  |

|        |                      |                          |                     |    |        |      |      |      |     |
|--------|----------------------|--------------------------|---------------------|----|--------|------|------|------|-----|
| 566K   | Common buzzard       | <i>Buteo buteo</i>       | 6055 Alpnach        | OW | Cloaca | neg. | n.d. | n.d. | N/A |
| 567Kot | Long-eared owl       | <i>Asio otus</i>         | 6042 Dietwil        | AG | Feces  | neg. | n.d. | n.d. | N/A |
| 568C   | Common buzzard       | <i>Buteo buteo</i>       | 6122 Menznau        | LU | Choana | neg. | n.d. | n.d. | N/A |
| 568K   | Common buzzard       | <i>Buteo buteo</i>       | 6122 Menznau        | LU | Cloaca | neg. | n.d. | n.d. | N/A |
| 569C   | Common buzzard       | <i>Buteo buteo</i>       | 6211 Buchs          | LU | Choana | neg. | n.d. | n.d. | N/A |
| 569K   | Common buzzard       | <i>Buteo buteo</i>       | 6211 Buchs          | LU | Cloaca | neg. | n.d. | n.d. | N/A |
| 570C   | Common buzzard       | <i>Buteo buteo</i>       | 6253 Dagmersellen   | LU | Choana | neg. | n.d. | n.d. | N/A |
| 570K   | Common buzzard       | <i>Buteo buteo</i>       | 6253 Dagmersellen   | LU | Cloaca | neg. | n.d. | n.d. | N/A |
| 571C   | Carrion crow         | <i>Corvus corone</i>     | 6285 Hitzkirch      | LU | Choana | neg. | n.d. | n.d. | N/A |
| 571K   | Carrion crow         | <i>Corvus corone</i>     | 6285 Hitzkirch      | LU | Cloaca | neg. | n.d. | n.d. | N/A |
| 572C   | Red kite             | <i>Milvus milvus</i>     | 6207 Nottwil        | LU | Choana | neg. | n.d. | n.d. | N/A |
| 572K   | Red kite             | <i>Milvus milvus</i>     | 6207 Nottwil        | LU | Cloaca | neg. | n.d. | n.d. | N/A |
| 573C   | Eurasian magpie      | <i>Pica pica</i>         | 6038 Gisikon        | LU | Choana | neg. | n.d. | n.d. | N/A |
| 573K   | Eurasian magpie      | <i>Pica pica</i>         | 6038 Gisikon        | LU | Cloaca | neg. | n.d. | n.d. | N/A |
| 574C   | Common buzzard       | <i>Buteo buteo</i>       | 6207 Nottwil        | LU | Choana | neg. | n.d. | n.d. | N/A |
| 574K   | Common buzzard       | <i>Buteo buteo</i>       | 6207 Nottwil        | LU | Cloaca | neg. | n.d. | n.d. | N/A |
| 575K   | Common buzzard       | <i>Buteo buteo</i>       | 6233 Büron          | LU | Cloaca | neg. | n.d. | n.d. | N/A |
| 576C   | Common buzzard       | <i>Buteo buteo</i>       | 6287 Aesch          | LU | Choana | neg. | n.d. | n.d. | N/A |
| 576K   | Common buzzard       | <i>Buteo buteo</i>       | 6287 Aesch          | LU | Cloaca | neg. | n.d. | n.d. | N/A |
| 577C   | Carrion crow         | <i>Corvus corone</i>     | Luzern              | LU | Choana | neg. | n.d. | n.d. | N/A |
| 577K   | Carrion crow         | <i>Corvus corone</i>     | Luzern              | LU | Cloaca | neg. | n.d. | n.d. | N/A |
| 578C   | Common kestrel       | <i>Falco tinnunculus</i> | Reiden              | LU | Choana | neg. | n.d. | n.d. | N/A |
| 578K   | Common kestrel       | <i>Falco tinnunculus</i> | Reiden              | LU | Cloaca | neg. | n.d. | n.d. | N/A |
| 579Kot | Tawny owl            | <i>Strix aluco</i>       | 6283 Baldegg        | LU | Feces  | neg. | n.d. | n.d. | N/A |
| 580C   | Red kite             | <i>Milvus milvus</i>     | 6218 Ettiswil       | LU | Choana | neg. | n.d. | n.d. | N/A |
| 580K   | Red kite             | <i>Milvus milvus</i>     | 6218 Ettiswil       | LU | Cloaca | neg. | n.d. | n.d. | N/A |
| 581C   | Rook                 | <i>Corvus frugilegus</i> | 5712 Beinwil am See | AG | Choana | neg. | n.d. | n.d. | N/A |
| 581K   | Rook                 | <i>Corvus frugilegus</i> | 5712 Beinwil am See | AG | Cloaca | neg. | n.d. | n.d. | N/A |
| 581Kot | Rook                 | <i>Corvus frugilegus</i> | 5712 Beinwil am See | AG | Feces  | neg. | n.d. | n.d. | N/A |
| 582Kot | Eurasian magpie      | <i>Pica pica</i>         | 6275 Ballwil        | LU | Feces  | neg. | n.d. | n.d. | N/A |
| 583Kot | Eurasian magpie      | <i>Pica pica</i>         | 6275 Ballwil        | LU | Feces  | neg. | n.d. | n.d. | N/A |
| 584Kot | Eurasian magpie      | <i>Pica pica</i>         | 6276 Ballwil        | LU | Feces  | neg. | n.d. | n.d. | N/A |
| 585Kot | Eurasian magpie      | <i>Pica pica</i>         | 6275 Ballwil        | LU | Feces  | neg. | n.d. | n.d. | N/A |
| 586Kot | Eurasian magpie      | <i>Pica pica</i>         | 6278 Ballwil        | LU | Feces  | neg. | n.d. | n.d. | N/A |
| 587C   | Long-eared owl       | <i>Asio otus</i>         | 6042 Dietwil        | AG | Choana | neg. | n.d. | n.d. | N/A |
| 587K   | Long-eared owl       | <i>Asio otus</i>         | 6042 Dietwil        | AG | Cloaca | neg. | n.d. | n.d. | N/A |
| 588Kot | Eurasian magpie      | <i>Pica pica</i>         | Luzern              | LU | Feces  | neg. | n.d. | n.d. | N/A |
| 589C   | Common buzzard       | <i>Buteo buteo</i>       | 5610 Wohlen         | AG | Choana | neg. | n.d. | n.d. | N/A |
| 589K   | Common buzzard       | <i>Buteo buteo</i>       | 5610 Wohlen         | AG | Cloaca | neg. | n.d. | n.d. | N/A |
| 590C   | Red kite             | <i>Milvus milvus</i>     | 6275 Ballwil        | LU | Choana | neg. | n.d. | n.d. | N/A |
| 590K   | Red kite             | <i>Milvus milvus</i>     | 6275 Ballwil        | LU | Cloaca | neg. | n.d. | n.d. | N/A |
| 591Kot | Common buzzard       | <i>Buteo buteo</i>       | Zug                 | ZG | Feces  | neg. | n.d. | n.d. | N/A |
| 592C   | Eurasian sparrowhawk | <i>Accipiter nisus</i>   | 6210 Sursee         | LU | Choana | neg. | n.d. | n.d. | N/A |

|        |                      |                            |                    |     |        |      |      |      |     |
|--------|----------------------|----------------------------|--------------------|-----|--------|------|------|------|-----|
| 592K   | Eurasian sparrowhawk | <i>Accipiter nisus</i>     | 6210 Sursee        | LU  | Cloaca | neg. | n.d. | n.d. | N/A |
| 593Kot | Carrion crow         | <i>Corvus corone</i>       | Unknown            | N/A | Feces  | neg. | n.d. | n.d. | N/A |
| 594C   | Carrion crow         | <i>Corvus corone</i>       | 6102 Malters       | LU  | Choana | neg. | n.d. | n.d. | N/A |
| 594K   | Carrion crow         | <i>Corvus corone</i>       | 6102 Malters       | LU  | Cloaca | neg. | n.d. | n.d. | N/A |
| 594Kot | Carrion crow         | <i>Corvus corone</i>       | 6102 Malters       | LU  | Feces  | neg. | n.d. | n.d. | N/A |
| 595Kot | Tawny owl            | <i>Strix aluco</i>         | St. Gallen         | SG  | Feces  | neg. | n.d. | n.d. | N/A |
| 596Kot | Carrion crow         | <i>Corvus corone</i>       | 6015 Luzern        | LU  | Feces  | neg. | n.d. | n.d. | N/A |
| 597Kot | Tawny owl            | <i>Strix aluco</i>         | 4457 Diegten       | BL  | Feces  | neg. | n.d. | n.d. | N/A |
| 598Kot | Eurasian magpie      | <i>Pica pica</i>           | 8805 Richterswil   | ZH  | Feces  | neg. | n.d. | n.d. | N/A |
| 599Kot | Eurasian magpie      | <i>Pica pica</i>           | 6000 Luzern        | LU  | Feces  | neg. | n.d. | n.d. | N/A |
| 600C   | Carrion crow         | <i>Corvus corone</i>       | 5737 Menziken      | AG  | Choana | neg. | n.d. | n.d. | N/A |
| 600K   | Carrion crow         | <i>Corvus corone</i>       | 5737 Menziken      | AG  | Cloaca | neg. | n.d. | n.d. | N/A |
| 601K   | Red kite             | <i>Milvus milvus</i>       | 6207 Nottwil       | LU  | Cloaca | neg. | n.d. | n.d. | N/A |
| 602Kot | Carrion crow         | <i>Corvus corone</i>       | 6102 Malters       | LU  | Feces  | neg. | n.d. | n.d. | N/A |
| 603C   | Eurasian jay         | <i>Garrulus glandarius</i> | 8134 Adliswil      | ZH  | Choana | neg. | n.d. | n.d. | N/A |
| 603K   | Eurasian jay         | <i>Garrulus glandarius</i> | 8134 Adliswil      | ZH  | Cloaca | neg. | n.d. | n.d. | N/A |
| 604C   | Carrion crow         | <i>Corvus corone</i>       | Luzern             | LU  | Cloaca | neg. | n.d. | n.d. | N/A |
| 604K   | Carrion crow         | <i>Corvus corone</i>       | Luzern             | LU  | Choana | neg. | n.d. | n.d. | N/A |
| 604Kot | Carrion crow         | <i>Corvus corone</i>       | Luzern             | LU  | Feces  | neg. | n.d. | n.d. | N/A |
| 605C   | Carrion crow         | <i>Corvus corone</i>       | 6274 Eschenbach    | SG  | Choana | neg. | n.d. | n.d. | N/A |
| 605K   | Carrion crow         | <i>Corvus corone</i>       | 6274 Eschenbach    | SG  | Cloaca | neg. | n.d. | n.d. | N/A |
| 606Kot | Common buzzard       | <i>Buteo buteo</i>         | 6027 Römerswil     | LU  | Feces  | neg. | n.d. | n.d. | N/A |
| 607Kot | Common buzzard       | <i>Buteo buteo</i>         | 6027 Römerswil     | LU  | Feces  | neg. | n.d. | n.d. | N/A |
| 608Kot | Carrion crow         | <i>Corvus corone</i>       | 6383 Dallenwil     | NW  | Feces  | neg. | n.d. | n.d. | N/A |
| 609Kot | Carrion crow         | <i>Corvus corone</i>       | 6022 Grosswangen   | LU  | Feces  | neg. | n.d. | n.d. | N/A |
| 611C   | Eurasian magpie      | <i>Pica pica</i>           | 6017 Ruswil        | LU  | Choana | neg. | n.d. | n.d. | N/A |
| 611K   | Eurasian magpie      | <i>Pica pica</i>           | 6017 Ruswil        | LU  | Cloaca | neg. | n.d. | n.d. | N/A |
| 611Kot | Eurasian magpie      | <i>Pica pica</i>           | 6017 Ruswil        | LU  | Feces  | neg. | n.d. | n.d. | N/A |
| 612C   | Carrion crow         | <i>Corvus corone</i>       | 6212 St. Erhard    | LU  | Choana | neg. | n.d. | n.d. | N/A |
| 612K   | Carrion crow         | <i>Corvus corone</i>       | 6212 St. Erhard    | LU  | Cloaca | neg. | n.d. | n.d. | N/A |
| 613Kot | Carrion crow         | <i>Corvus corone</i>       | 6280 Urswil        | LU  | Feces  | neg. | n.d. | n.d. | N/A |
| 614C   | Carrion crow         | <i>Corvus corone</i>       | 6242 Wauwil        | LU  | Choana | neg. | n.d. | n.d. | N/A |
| 614K   | Carrion crow         | <i>Corvus corone</i>       | 6242 Wauwil        | LU  | Cloaca | neg. | n.d. | n.d. | N/A |
| 615C   | Common buzzard       | <i>Buteo buteo</i>         | 6103 Schwarzenberg | LU  | Choana | neg. | n.d. | n.d. | N/A |
| 615K   | Common buzzard       | <i>Buteo buteo</i>         | 6103 Schwarzenberg | LU  | Cloaca | neg. | n.d. | n.d. | N/A |
| 616Kot | Red kite             | <i>Milvus milvus</i>       | 5628 Aristau       | AG  | Feces  | neg. | n.d. | n.d. | N/A |
| 617C   | Eurasian magpie      | <i>Pica pica</i>           | 6015 Luzern        | LU  | Choana | neg. | n.d. | n.d. | N/A |
| 617K   | Eurasian magpie      | <i>Pica pica</i>           | 6015 Luzern        | LU  | Cloaca | neg. | n.d. | n.d. | N/A |
| 617Kot | Eurasian magpie      | <i>Pica pica</i>           | 6015 Luzern        | LU  | Feces  | neg. | n.d. | n.d. | N/A |
| 618C   | Carrion crow         | <i>Corvus corone</i>       | 6287 Aesch         | LU  | Choana | neg. | n.d. | n.d. | N/A |
| 618K   | Carrion crow         | <i>Corvus corone</i>       | 6287 Aesch         | LU  | Cloaca | neg. | n.d. | n.d. | N/A |
| 619C   | Carrion crow         | <i>Corvus corone</i>       | 4312 Magden        | AG  | Choana | neg. | n.d. | n.d. | N/A |
| 619K   | Carrion crow         | <i>Corvus corone</i>       | 4312 Magden        | AG  | Cloaca | neg. | n.d. | n.d. | N/A |

|               |                      |                          |                      |     |        |             |      |      |                       |
|---------------|----------------------|--------------------------|----------------------|-----|--------|-------------|------|------|-----------------------|
| <b>620Kot</b> | Common kestrel       | <i>Falco tinnunculus</i> | 6373 Ennetbürgen     | NW  | Feces  | neg.        | n.d. | n.d. | N/A                   |
| <b>621C</b>   | Rook                 | <i>Corvus frugilegus</i> | Unknown              | N/A | Choana | pos. (23.9) | neg. | neg. | <i>C. psittaci</i> 1V |
| <b>621K</b>   | Rook                 | <i>Corvus frugilegus</i> | Unknown              | N/A | Cloaca | neg.        | n.d. | n.d. | N/A                   |
| <b>621Kot</b> | Rook                 | <i>Corvus frugilegus</i> | Unknown              | N/A | Feces  | neg.        | n.d. | n.d. | N/A                   |
| <b>622C</b>   | Eurasian magpie      | <i>Pica pica</i>         | 6102 Malters         | LU  | Choana | neg.        | n.d. | n.d. | N/A                   |
| <b>622K</b>   | Eurasian magpie      | <i>Pica pica</i>         | 6102 Malters         | LU  | Cloaca | neg.        | n.d. | n.d. | N/A                   |
| <b>622Kot</b> | Eurasian magpie      | <i>Pica pica</i>         | 6102 Malters         | LU  | Feces  | neg.        | n.d. | n.d. | N/A                   |
| <b>623C</b>   | Eurasian magpie      | <i>Pica pica</i>         | 5634 Merenschwand    | AG  | Choana | neg.        | n.d. | n.d. | N/A                   |
| <b>623K</b>   | Eurasian magpie      | <i>Pica pica</i>         | 5634 Merenschwand    | AG  | Cloaca | neg.        | n.d. | n.d. | N/A                   |
| <b>623Kot</b> | Eurasian magpie      | <i>Pica pica</i>         | 5634 Merenschwand    | AG  | Feces  | neg.        | n.d. | n.d. | N/A                   |
| <b>624Kot</b> | Common kestrel       | <i>Falco tinnunculus</i> | 6014 Luzern          | LU  | Feces  | neg.        | n.d. | n.d. | N/A                   |
| <b>625C</b>   | Black kite           | <i>Milvus migrans</i>    | 6289 Hämikon         | LU  | Choana | neg.        | n.d. | n.d. | N/A                   |
| <b>625K</b>   | Black kite           | <i>Milvus migrans</i>    | 6289 Hämikon         | LU  | Cloaca | neg.        | n.d. | n.d. | N/A                   |
| <b>626C</b>   | Eurasian magpie      | <i>Pica pica</i>         | 6203 Sempach-Station | LU  | Choana | neg.        | n.d. | n.d. | N/A                   |
| <b>626K</b>   | Eurasian magpie      | <i>Pica pica</i>         | 6203 Sempach-Station | LU  | Cloaca | neg.        | n.d. | n.d. | N/A                   |
| <b>626Kot</b> | Eurasian magpie      | <i>Pica pica</i>         | 6203 Sempach-Station | LU  | Feces  | neg.        | n.d. | n.d. | N/A                   |
| <b>627Kot</b> | Carrion crow         | <i>Corvus corone</i>     | 6020 Emmenbrücke     | LU  | Feces  | neg.        | n.d. | n.d. | N/A                   |
| <b>628Kot</b> | Western jackdaw      |                          | 6000 Luzern          | LU  | Feces  | neg.        | n.d. | n.d. | N/A                   |
| <b>629C</b>   | Carrion crow         | <i>Corvus corone</i>     | 5628 Aristau         | AG  | Choana | neg.        | n.d. | n.d. | N/A                   |
| <b>629K</b>   | Carrion crow         | <i>Corvus corone</i>     | 5628 Aristau         | AG  | Cloaca | neg.        | n.d. | n.d. | N/A                   |
| <b>630C</b>   | Carrion crow         | <i>Corvus corone</i>     | 6005 Luzern          | LU  | Choana | neg.        | n.d. | n.d. | N/A                   |
| <b>630K</b>   | Carrion crow         | <i>Corvus corone</i>     | 6005 Luzern          | LU  | Cloaca | neg.        | n.d. | n.d. | N/A                   |
| <b>631C</b>   | Western jackdaw      | <i>Corvus monedula</i>   | 4915 St. Urban       | LU  | Choana | neg.        | n.d. | n.d. | N/A                   |
| <b>631K</b>   | Western jackdaw      | <i>Corvus monedula</i>   | 4915 St. Urban       | LU  | Cloaca | neg.        | n.d. | n.d. | N/A                   |
| <b>631Kot</b> | Western jackdaw      | <i>Corvus monedula</i>   | 4915 St. Urban       | LU  | Feces  | neg.        | n.d. | n.d. | N/A                   |
| <b>632Kot</b> | Western jackdaw      | <i>Corvus monedula</i>   | Unknown              | N/A | Feces  | neg.        | n.d. | n.d. | N/A                   |
| <b>633C</b>   | Carrion crow         | <i>Corvus corone</i>     | 6006 Luzern          | LU  | Choana | neg.        | n.d. | n.d. | N/A                   |
| <b>633K</b>   | Carrion crow         | <i>Corvus corone</i>     | 6006 Luzern          | LU  | Cloaca | neg.        | n.d. | n.d. | N/A                   |
| <b>635C</b>   | Carrion crow         | <i>Corvus corone</i>     | 5037 Muhen           | AG  | Choana | neg.        | n.d. | n.d. | N/A                   |
| <b>635K</b>   | Carrion crow         | <i>Corvus corone</i>     | 5037 Muhen           | AG  | Cloaca | neg.        | n.d. | n.d. | N/A                   |
| <b>636C</b>   | Barn owl             | <i>Tyto alba</i>         | 6203 Sempach-Station | LU  | Choana | neg.        | n.d. | n.d. | N/A                   |
| <b>636K</b>   | Barn owl             | <i>Tyto alba</i>         | 6203 Sempach-Station | LU  | Cloaca | neg.        | n.d. | n.d. | N/A                   |
| <b>636Kot</b> | Barn owl             | <i>Tyto alba</i>         | 6203 Sempach-Station | LU  | Feces  | neg.        | n.d. | n.d. | N/A                   |
| <b>637C</b>   | Carrion crow         | <i>Corvus corone</i>     | 6000 Luzern          | LU  | Choana | neg.        | n.d. | n.d. | N/A                   |
| <b>637K</b>   | Carrion crow         | <i>Corvus corone</i>     | 6000 Luzern          | LU  | Cloaca | neg.        | n.d. | n.d. | N/A                   |
| <b>655C</b>   | Common buzzard       | <i>Buteo buteo</i>       | 8213 Neunkirch       | SH  | Choana | neg.        | n.d. | n.d. | N/A                   |
| <b>655K</b>   | Common buzzard       | <i>Buteo buteo</i>       | 8213 Neunkirch       | SH  | Cloaca | neg.        | n.d. | n.d. | N/A                   |
| <b>656C</b>   | Eurasian sparrowhawk | <i>Accipiter nisus</i>   | 8625 Gossau          | SG  | Choana | neg.        | n.d. | n.d. | N/A                   |
| <b>656K</b>   | Eurasian sparrowhawk | <i>Accipiter nisus</i>   | 8625 Gossau          | SG  | Cloaca | neg.        | n.d. | n.d. | N/A                   |
| <b>657C</b>   | Common buzzard       | <i>Buteo buteo</i>       | 9548 Matzingen       | TG  | Choana | neg.        | n.d. | n.d. | N/A                   |
| <b>657K</b>   | Common buzzard       | <i>Buteo buteo</i>       | 9548 Matzingen       | TG  | Cloaca | neg.        | n.d. | n.d. | N/A                   |
| <b>658C</b>   | Common buzzard       | <i>Buteo buteo</i>       | 8302 Klotten         | ZH  | Choana | neg.        | n.d. | n.d. | N/A                   |
| <b>658K</b>   | Common buzzard       | <i>Buteo buteo</i>       | 8302 Klotten         | ZH  | Cloaca | neg.        | n.d. | n.d. | N/A                   |

|        |                      |                          |                          |     |        |              |      |      |                        |
|--------|----------------------|--------------------------|--------------------------|-----|--------|--------------|------|------|------------------------|
| 659C   | Red kite             | <i>Milvus milvus</i>     | 8547 Kefikon             | TG  | Choana | neg.         | n.d. | n.d. | N/A                    |
| 659K   | Red kite             | <i>Milvus milvus</i>     | 8547 Kefikon             | TG  | Cloaca | neg.         | n.d. | n.d. | N/A                    |
| 660C   | Common buzzard       | <i>Buteo buteo</i>       | 8590 Romanshorn          | TG  | Choana | neg.         | n.d. | n.d. | N/A                    |
| 660K   | Common buzzard       | <i>Buteo buteo</i>       | 8590 Romanshorn          | TG  | Cloaca | neg.         | n.d. | n.d. | N/A                    |
| 661C   | Common kestrel       | <i>Falco tinnunculus</i> | 3267 Seedorf             | BE  | Choana | neg.         | n.d. | n.d. | N/A                    |
| 661K   | Common kestrel       | <i>Falco tinnunculus</i> | 3267 Seedorf             | BE  | Cloaca | neg.         | n.d. | n.d. | N/A                    |
| 662C   | Common kestrel       | <i>Falco tinnunculus</i> | 3125 Toffen              | BE  | Choana | neg.         | n.d. | n.d. | N/A                    |
| 662K   | Common kestrel       | <i>Falco tinnunculus</i> | 3125 Toffen              | BE  | Cloaca | neg.         | n.d. | n.d. | N/A                    |
| 663C   | Common buzzard       | <i>Buteo buteo</i>       | 4553 Subingen            | SO  | Choana | neg.         | n.d. | n.d. | N/A                    |
| 663K   | Common buzzard       | <i>Buteo buteo</i>       | 4553 Subingen            | SO  | Cloaca | neg.         | n.d. | n.d. | N/A                    |
| 664C   | Eurasian magpie      | <i>Pica pica</i>         | 3280 Murten              | FR  | Choana | neg.         | n.d. | n.d. | N/A                    |
| 664K   | Eurasian magpie      | <i>Pica pica</i>         | 3280 Murten              | FR  | Cloaca | neg.         | n.d. | n.d. | N/A                    |
| 665C   | Common buzzard       | <i>Buteo buteo</i>       | 3628 Uttigen             | BE  | Choana | neg.         | n.d. | n.d. | N/A                    |
| 665K   | Common buzzard       | <i>Buteo buteo</i>       | 3628 Uttigen             | BE  | Cloaca | neg.         | n.d. | n.d. | N/A                    |
| 666Kot | Common buzzard       | <i>Buteo buteo</i>       | 3380 Wangen a.d.<br>Aare | BE  | Feces  | neg.         | n.d. | n.d. | N/A                    |
| 667C   | Red kite             | <i>Milvus milvus</i>     | 8454 Buchberg            | SH  | Choana | neg.         | n.d. | n.d. | N/A                    |
| 667K   | Red kite             | <i>Milvus milvus</i>     | 8454 Buchberg            | SH  | Cloaca | neg.         | n.d. | n.d. | N/A                    |
| 668C   | Common buzzard       | <i>Buteo buteo</i>       | 8416 Flaach              | ZH  | Choana | pos. (38.3)  | neg. | neg. | Not identified         |
| 668K   | Common buzzard       | <i>Buteo buteo</i>       | 8416 Flaach              | ZH  | Cloaca | neg.         | n.d. | n.d. | N/A                    |
| 669C   | Common buzzard       | <i>Buteo buteo</i>       | Unknown                  | N/A | Choana | pos. (27.9)  | neg. | neg. | <i>C. psittaci</i> M56 |
| 669K   | Common buzzard       | <i>Buteo buteo</i>       | Unknown                  | N/A | Cloaca | pos. (16.2)  | neg. | neg. | <i>C. psittaci</i> M56 |
| 670C   | Common buzzard       | <i>Buteo buteo</i>       | Unknown                  | N/A | Choana | neg.         | n.d. | n.d. | N/A                    |
| 670K   | Common buzzard       | <i>Buteo buteo</i>       | Unknown                  | N/A | Cloaca | neg.         | n.d. | n.d. | N/A                    |
| 671C   | Common buzzard       | <i>Buteo buteo</i>       | 8254 Basadingen          | TG  | Choana | pos. (34.0)  | neg. | neg. | <i>C. psittaci</i> M56 |
| 671K   | Common buzzard       | <i>Buteo buteo</i>       | 8254 Basadingen          | TG  | Cloaca | pos. (27.1)  | neg. | neg. | <i>C. psittaci</i> M56 |
| 672C   | Common buzzard       | <i>Buteo buteo</i>       | 8315 Tagelswangen        | ZH  | Choana | pos. (37.1)  | neg. | neg. | Not identified         |
| 672K   | Common buzzard       | <i>Buteo buteo</i>       | 8315 Tagelswangen        | ZH  | Cloaca | pos. (37.5)  | neg. | neg. | Not identified         |
| 673C   | Common buzzard       | <i>Buteo buteo</i>       | 8200 Schaffhausen        | SH  | Choana | pos. (35.8)  | neg. | neg. | Not identified         |
| 673K   | Common buzzard       | <i>Buteo buteo</i>       | 8200 Schaffhausen        | SH  | Cloaca | pos. (35.9)  | neg. | neg. | Not identified         |
| 674C   | Eurasian sparrowhawk | <i>Accipiter nisus</i>   | Unknown                  | N/A | Choana | pos. (36.9)  | neg. | neg. | Not identified         |
| 674K   | Eurasian sparrowhawk | <i>Accipiter nisus</i>   | Unknown                  | N/A | Cloaca | pos. (36.67) | neg. | neg. | Not identified         |
| 675C   | Eurasian sparrowhawk | <i>Accipiter nisus</i>   | 8472 Seuzach             | ZH  | Choana | neg.         | n.d. | n.d. | N/A                    |
| 675K   | Eurasian sparrowhawk | <i>Accipiter nisus</i>   | 8472 Seuzach             | ZH  | Cloaca | pos. (36.62) | neg. | neg. | Not identified         |
| 676C   | Eurasian sparrowhawk | <i>Accipiter nisus</i>   | 8192 Glattfelden         | ZH  | Choana | neg.         | n.d. | n.d. | N/A                    |
| 676K   | Eurasian sparrowhawk | <i>Accipiter nisus</i>   | 8192 Glattfelden         | ZH  | Cloaca | neg.         | n.d. | n.d. | N/A                    |
| 677C   | Red kite             | <i>Milvus milvus</i>     | 8952 Schlieren           | ZH  | Choana | neg.         | n.d. | n.d. | N/A                    |
| 677K   | Red kite             | <i>Milvus milvus</i>     | 8952 Schlieren           | ZH  | Cloaca | pos. (33.5)  | neg. | neg. | Not identified         |
| 679C   | Common buzzard       | <i>Buteo buteo</i>       | 9113 Degersheim          | SG  | Choana | neg.         | n.d. | n.d. | N/A                    |
| 679K   | Common buzzard       | <i>Buteo buteo</i>       | 9113 Degersheim          | SG  | Cloaca | neg.         | n.d. | n.d. | N/A                    |
| 680C   | Common buzzard       | <i>Buteo buteo</i>       | 5620 Bremgarten          | AG  | Choana | neg.         | n.d. | n.d. | N/A                    |
| 680K   | Common buzzard       | <i>Buteo buteo</i>       | 5620 Bremgarten          | AG  | Cloaca | neg.         | n.d. | n.d. | N/A                    |
| 681C   | Common buzzard       | <i>Buteo buteo</i>       | 8232 Merishausen         | SH  | Choana | neg.         | n.d. | n.d. | N/A                    |

|      |                |                      |                  |     |        |                    |             |      |                               |
|------|----------------|----------------------|------------------|-----|--------|--------------------|-------------|------|-------------------------------|
| 681K | Common buzzard | <i>Buteo buteo</i>   | 8232 Merishausen | SH  | Cloaca | neg.               | n.d.        | n.d. | N/A                           |
| 682C | Common buzzard | <i>Buteo buteo</i>   | Unknown          | N/A | Choana | neg.               | n.d.        | n.d. | N/A                           |
| 682K | Common buzzard | <i>Buteo buteo</i>   | Unknown          | N/A | Cloaca | neg.               | n.d.        | n.d. | N/A                           |
| 683C | Common buzzard | <i>Buteo buteo</i>   | Unknown          | N/A | Choana | pos. (33.3)        | pos. (33.2) | neg. | <i>C. psittaci</i> A          |
| 683K | Common buzzard | <i>Buteo buteo</i>   | Unknown          | N/A | Cloaca | neg.               | n.d.        | n.d. | N/A                           |
| 684C | Carrion crow   | <i>Corvus corone</i> | Stadt Zürich     | ZH  | Choana | neg.               | n.d.        | n.d. | N/A                           |
| 684K | Carrion crow   | <i>Corvus corone</i> | Stadt Zürich     | ZH  | Cloaca | neg.               | n.d.        | n.d. | N/A                           |
| 685C | Carrion crow   | <i>Corvus corone</i> | Stadt Zürich     | ZH  | Choana | neg.               | n.d.        | n.d. | N/A                           |
| 685K | Carrion crow   | <i>Corvus corone</i> | Stadt Zürich     | ZH  | Cloaca | neg.               | n.d.        | n.d. | N/A                           |
| 686C | Carrion crow   | <i>Corvus corone</i> | 8003 Zürich      | ZH  | Choana | pos. (34.5)        | neg.        | neg. | <i>C. abortus/C. psittaci</i> |
| 686K | Carrion crow   | <i>Corvus corone</i> | 8003 Zürich      | ZH  | Cloaca | neg.               | n.d.        | n.d. | N/A                           |
| 687C | Common buzzard | <i>Buteo buteo</i>   | 8465 Trüllikon   | ZH  | Choana | neg.               | n.d.        | n.d. | N/A                           |
| 687K | Common buzzard | <i>Buteo buteo</i>   | 8465 Trüllikon   | ZH  | Cloaca | neg.               | n.d.        | n.d. | N/A                           |
| 688C | Carrion crow   | <i>Corvus corone</i> | Stadt Zürich     | ZH  | Choana | pos. (28.2)        | neg.        | neg. | <i>C. psittaci</i> 1V         |
| 688K | Carrion crow   | <i>Corvus corone</i> | Stadt Zürich     | ZH  | Cloaca | pos. (33.8)        | neg.        | neg. | <i>C. abortus/C. psittaci</i> |
| 689C | Carrion crow   | <i>Corvus corone</i> | Stadt Zürich     | ZH  | Choana | pos. (26.8)        | neg.        | neg. | <i>C. psittaci</i> 1V         |
| 689K | Carrion crow   | <i>Corvus corone</i> | Stadt Zürich     | ZH  | Cloaca | pos. (33.2)        | neg.        | neg. | <i>C. abortus/C. psittaci</i> |
| 690C | Carrion crow   | <i>Corvus corone</i> | Stadt Zürich     | ZH  | Choana | pos. (29.4)        | neg.        | neg. | <i>C. psittaci</i> 1V         |
| 690K | Carrion crow   | <i>Corvus corone</i> | Stadt Zürich     | ZH  | Cloaca | neg.               | n.d.        | n.d. | N/A                           |
| 691C | Carrion crow   | <i>Corvus corone</i> | Stadt Zürich     | ZH  | Choana | neg.               | n.d.        | n.d. | N/A                           |
| 691K | Carrion crow   | <i>Corvus corone</i> | Stadt Zürich     | ZH  | Cloaca | neg.               | n.d.        | n.d. | N/A                           |
| 692C | Carrion crow   | <i>Corvus corone</i> | Stadt Zürich     | ZH  | Choana | neg.               | n.d.        | n.d. | N/A                           |
| 692K | Carrion crow   | <i>Corvus corone</i> | Stadt Zürich     | ZH  | Cloaca | neg.               | n.d.        | n.d. | N/A                           |
| 693C | Carrion crow   | <i>Corvus corone</i> | Stadt Zürich     | ZH  | Choana | neg.               | n.d.        | n.d. | N/A                           |
| 693K | Carrion crow   | <i>Corvus corone</i> | Stadt Zürich     | ZH  | Cloaca | neg.               | n.d.        | n.d. | N/A                           |
| 694C | Carrion crow   | <i>Corvus corone</i> | Stadt Zürich     | ZH  | Choana | neg.               | n.d.        | n.d. | N/A                           |
| 694K | Carrion crow   | <i>Corvus corone</i> | Stadt Zürich     | ZH  | Cloaca | neg.               | n.d.        | n.d. | N/A                           |
| 695C | Carrion crow   | <i>Corvus corone</i> | Stadt Zürich     | ZH  | Choana | neg.               | n.d.        | n.d. | N/A                           |
| 695K | Carrion crow   | <i>Corvus corone</i> | Stadt Zürich     | ZH  | Cloaca | neg.               | n.d.        | n.d. | N/A                           |
| 696C | Carrion crow   | <i>Corvus corone</i> | Stadt Zürich     | ZH  | Choana | pos. (28.9)        | neg.        | neg. | <i>C. abortus/C. psittaci</i> |
| 696K | Carrion crow   | <i>Corvus corone</i> | Stadt Zürich     | ZH  | Cloaca | pos. (36.9 (1:10)) | neg.        | neg. | Not identified                |
| 697C | Carrion crow   | <i>Corvus corone</i> | Stadt Zürich     | ZH  | Choana | neg.               | n.d.        | n.d. | N/A                           |
| 697K | Carrion crow   | <i>Corvus corone</i> | Stadt Zürich     | ZH  | Cloaca | neg.               | n.d.        | n.d. | N/A                           |
| 698C | Carrion crow   | <i>Corvus corone</i> | Stadt Zürich     | ZH  | Choana | neg.               | n.d.        | n.d. | N/A                           |
| 698K | Carrion crow   | <i>Corvus corone</i> | Stadt Zürich     | ZH  | Cloaca | neg.               | n.d.        | n.d. | N/A                           |
| 699C | Carrion crow   | <i>Corvus corone</i> | Stadt Zürich     | ZH  | Choana | neg.               | n.d.        | n.d. | N/A                           |
| 699K | Carrion crow   | <i>Corvus corone</i> | Stadt Zürich     | ZH  | Cloaca | neg.               | n.d.        | n.d. | N/A                           |
| 700C | Carrion crow   | <i>Corvus corone</i> | Stadt Zürich     | ZH  | Choana | neg.               | neg.        | neg. | N/A                           |
| 700K | Carrion crow   | <i>Corvus corone</i> | Stadt Zürich     | ZH  | Cloaca | neg.               | n.d.        | n.d. | N/A                           |
| 701C | Carrion crow   | <i>Corvus corone</i> | Stadt Zürich     | ZH  | Choana | neg.               | n.d.        | n.d. | N/A                           |
| 701K | Carrion crow   | <i>Corvus corone</i> | Stadt Zürich     | ZH  | Cloaca | neg.               | n.d.        | n.d. | N/A                           |
| 702C | Carrion crow   | <i>Corvus corone</i> | Stadt Zürich     | ZH  | Choana | pos. (31.6)        | neg.        | neg. | <i>C. abortus/C. psittaci</i> |
| 702K | Carrion crow   | <i>Corvus corone</i> | Stadt Zürich     | ZH  | Cloaca | neg.               | n.d.        | n.d. | N/A                           |



|      |                 |                          |               |     |        |             |      |      |                               |
|------|-----------------|--------------------------|---------------|-----|--------|-------------|------|------|-------------------------------|
| 703C | Carrion crow    | <i>Corvus corone</i>     | Stadt Zürich  | ZH  | Choana | neg.        | n.d. | n.d. | N/A                           |
| 703K | Carrion crow    | <i>Corvus corone</i>     | Stadt Zürich  | ZH  | Cloaca | neg.        | n.d. | n.d. | N/A                           |
| 704C | Carrion crow    | <i>Corvus corone</i>     | Stadt Zürich  | ZH  | Choana | neg.        | n.d. | n.d. | N/A                           |
| 704K | Carrion crow    | <i>Corvus corone</i>     | Stadt Zürich  | ZH  | Cloaca | neg.        | n.d. | n.d. | N/A                           |
| 705C | Carrion crow    | <i>Corvus corone</i>     | Stadt Zürich  | ZH  | Choana | pos. (30.9) | neg. | neg. | <i>C. abortus/C. psittaci</i> |
| 705K | Carrion crow    | <i>Corvus corone</i>     | Stadt Zürich  | ZH  | Cloaca | pos. (37.2) | neg. | neg. | Not identified                |
| 706C | Carrion crow    | <i>Corvus corone</i>     | Stadt Zürich  | ZH  | Choana | pos. (30.2) | neg. | neg. | <i>C. psittaci</i> D          |
| 706K | Carrion crow    | <i>Corvus corone</i>     | Stadt Zürich  | ZH  | Cloaca | neg.        | n.d. | n.d. | N/A                           |
| 707C | Eurasian magpie | <i>Pica pica</i>         | Unknown       | N/A | Choana | neg.        | n.d. | n.d. | N/A                           |
| 707K | Eurasian magpie | <i>Pica pica</i>         | Unknown       | N/A | Cloaca | neg.        | n.d. | n.d. | N/A                           |
| 708C | Carrion crow    | <i>Corvus corone</i>     | Stadt Zürich  | ZH  | Choana | neg.        | n.d. | n.d. | N/A                           |
| 708K | Carrion crow    | <i>Corvus corone</i>     | Stadt Zürich  | ZH  | Cloaca | neg.        | n.d. | n.d. | N/A                           |
| 711C | Carrion crow    | <i>Corvus corone</i>     | 2564 Bellmund | BE  | Choana | pos. (31.6) | neg. | neg. | <i>C. psittaci</i> 1V         |
| 711K | Carrion crow    | <i>Corvus corone</i>     | 2564 Bellmund | BE  | Cloaca | neg.        | n.d. | n.d. | N/A                           |
| 712C | Carrion crow    | <i>Corvus corone</i>     | 2564 Bellmund | BE  | Choana | neg.        | n.d. | n.d. | N/A                           |
| 712K | Carrion crow    | <i>Corvus corone</i>     | 2564 Bellmund | BE  | Cloaca | neg.        | n.d. | n.d. | N/A                           |
| 713C | Carrion crow    | <i>Corvus corone</i>     | 2564 Bellmund | BE  | Choana | neg.        | n.d. | n.d. | N/A                           |
| 713K | Carrion crow    | <i>Corvus corone</i>     | 2564 Bellmund | BE  | Cloaca | neg.        | n.d. | n.d. | N/A                           |
| 714C | Carrion crow    | <i>Corvus corone</i>     | 2564 Bellmund | BE  | Choana | neg.        | n.d. | n.d. | N/A                           |
| 714K | Carrion crow    | <i>Corvus corone</i>     | 2564 Bellmund | BE  | Cloaca | neg.        | n.d. | n.d. | N/A                           |
| 715C | Carrion crow    | <i>Corvus corone</i>     | 2564 Bellmund | BE  | Choana | pos. (38.1) | neg. | neg. | Not identified                |
| 715K | Carrion crow    | <i>Corvus corone</i>     | 2564 Bellmund | BE  | Cloaca | neg.        | n.d. | n.d. | N/A                           |
| 716C | Carrion crow    | <i>Corvus corone</i>     | 2564 Bellmund | BE  | Choana | neg.        | n.d. | n.d. | N/A                           |
| 716K | Carrion crow    | <i>Corvus corone</i>     | 2564 Bellmund | BE  | Cloaca | pos. (30.6) | neg. | neg. | <i>C. psittaci</i> D          |
| 717C | Carrion crow    | <i>Corvus corone</i>     | 2564 Bellmund | BE  | Choana | neg.        | n.d. | n.d. | N/A                           |
| 717K | Carrion crow    | <i>Corvus corone</i>     | 2564 Bellmund | BE  | Cloaca | neg.        | n.d. | n.d. | N/A                           |
| 718C | Rook            | <i>Corvus frugilegus</i> | 2564 Bellmund | BE  | Choana | neg.        | n.d. | n.d. | N/A                           |
| 718K | Rook            | <i>Corvus frugilegus</i> | 2564 Bellmund | BE  | Cloaca | neg.        | n.d. | n.d. | N/A                           |
| 719C | Common buzzard  | <i>Buteo buteo</i>       | 3270 Aarberg  | BE  | Choana | neg.        | n.d. | n.d. | N/A                           |
| 719K | Common buzzard  | <i>Buteo buteo</i>       | 3270 Aarberg  | BE  | Cloaca | neg.        | n.d. | n.d. | N/A                           |
| 720C | Eurasian hobby  | <i>Falco subbuteo</i>    | 8452 Adlikon  | ZH  | Choana | neg.        | n.d. | n.d. | N/A                           |
| 720K | Eurasian hobby  | <i>Falco subbuteo</i>    | 8452 Adlikon  | ZH  | Cloaca | neg.        | n.d. | n.d. | N/A                           |
| 721C | Carrion crow    | <i>Corvus corone</i>     | Stadt Zürich  | ZH  | Choana | pos. (29.9) | neg. | neg. | <i>C. psittaci</i> 1V         |
| 721K | Carrion crow    | <i>Corvus corone</i>     | Stadt Zürich  | ZH  | Cloaca | neg.        | n.d. | n.d. | N/A                           |
| 722C | Carrion crow    | <i>Corvus corone</i>     | Stadt Zürich  | ZH  | Choana | neg.        | n.d. | n.d. | N/A                           |
| 722K | Carrion crow    | <i>Corvus corone</i>     | Stadt Zürich  | ZH  | Cloaca | neg.        | n.d. | n.d. | N/A                           |
| 723C | Carrion crow    | <i>Corvus corone</i>     | Stadt Zürich  | ZH  | Choana | neg.        | n.d. | n.d. | N/A                           |
| 723K | Carrion crow    | <i>Corvus corone</i>     | Stadt Zürich  | ZH  | Cloaca | neg.        | n.d. | n.d. | N/A                           |
| 724C | Carrion crow    | <i>Corvus corone</i>     | Stadt Zürich  | ZH  | Choana | neg.        | n.d. | n.d. | N/A                           |
| 724K | Carrion crow    | <i>Corvus corone</i>     | Stadt Zürich  | ZH  | Cloaca | neg.        | n.d. | n.d. | N/A                           |
| 725C | Carrion crow    | <i>Corvus corone</i>     | Stadt Zürich  | ZH  | Choana | pos. (31.6) | neg. | neg. | <i>C. abortus/C. psittaci</i> |
| 725K | Carrion crow    | <i>Corvus corone</i>     | Stadt Zürich  | ZH  | Cloaca | neg.        | n.d. | n.d. | N/A                           |
| 726K | Common kestrel  | <i>Falco tinnunculus</i> | Stadt Zürich  | ZH  | Cloaca | neg.        | n.d. | n.d. | N/A                           |

|      |                      |                          |             |     |        |             |      |      |                               |
|------|----------------------|--------------------------|-------------|-----|--------|-------------|------|------|-------------------------------|
| 727C | Common buzzard       | <i>Buteo buteo</i>       | Unknown     | N/A | Choana | neg.        | n.d. | n.d. | N/A                           |
| 727K | Common buzzard       | <i>Buteo buteo</i>       | Unknown     | N/A | Cloaca | neg.        | n.d. | n.d. | N/A                           |
| 728C | Barn owl             | <i>Tyto alba</i>         | 1786 Sugiez | FR  | Choana | neg.        | n.d. | n.d. | N/A                           |
| 728K | Barn owl             | <i>Tyto alba</i>         | 1786 Sugiez | FR  | Cloaca | neg.        | n.d. | n.d. | N/A                           |
| 729C | Tawny owl            | <i>Strix aluco</i>       | 1786 Sugiez | FR  | Choana | neg.        | n.d. | n.d. | N/A                           |
| 729K | Tawny owl            | <i>Strix aluco</i>       | 1786 Sugiez | FR  | Cloaca | neg.        | n.d. | n.d. | N/A                           |
| 730C | Common kestrel       | <i>Falco tinnunculus</i> | Unknown     | N/A | Choana | neg.        | n.d. | n.d. | N/A                           |
| 730K | Common kestrel       | <i>Falco tinnunculus</i> | Unknown     | N/A | Cloaca | neg.        | n.d. | n.d. | N/A                           |
| 731C | Red kite             | <i>Milvus milvus</i>     | Unknown     | N/A | Choana | neg.        | n.d. | n.d. | N/A                           |
| 731K | Red kite             | <i>Milvus milvus</i>     | Unknown     | N/A | Cloaca | neg.        | n.d. | n.d. | N/A                           |
| 732C | Common buzzard       | <i>Buteo buteo</i>       | Unknown     | N/A | Choana | neg.        | n.d. | n.d. | N/A                           |
| 732K | Common buzzard       | <i>Buteo buteo</i>       | Unknown     | N/A | Cloaca | neg.        | n.d. | n.d. | N/A                           |
| 733C | Eurasian sparrowhawk | <i>Accipiter nisus</i>   | Unknown     | N/A | Choana | neg.        | n.d. | n.d. | N/A                           |
| 733K | Eurasian sparrowhawk | <i>Accipiter nisus</i>   | Unknown     | N/A | Cloaca | neg.        | n.d. | n.d. | N/A                           |
| 734C | Long-eared owl       | <i>Asio otus</i>         | Unknown     | N/A | Choana | neg.        | n.d. | n.d. | N/A                           |
| 734K | Long-eared owl       | <i>Asio otus</i>         | Unknown     | N/A | Cloaca | neg.        | n.d. | n.d. | N/A                           |
| 735C | Carrion crow         | <i>Corvus corone</i>     | Zug         | ZG  | Choana | pos. (28.4) | neg. | neg. | <i>C. psittaci</i> 1V         |
| 735K | Carrion crow         | <i>Corvus corone</i>     | Zug         | ZG  | Cloaca | neg.        | n.d. | n.d. | N/A                           |
| 736C | Carrion crow         | <i>Corvus corone</i>     | Zug         | ZG  | Choana | pos. (28.7) | neg. | neg. | <i>C. psittaci</i> 6N         |
| 736K | Carrion crow         | <i>Corvus corone</i>     | Zug         | ZG  | Cloaca | pos. (30.6) | neg. | neg. | <i>C. abortus/C. psittaci</i> |
| 737C | Carrion crow         | <i>Corvus corone</i>     | Zug         | ZG  | Choana | pos. (31.1) | neg. | neg. | <i>C. abortus/C. psittaci</i> |
| 737K | Carrion crow         | <i>Corvus corone</i>     | Zug         | ZG  | Cloaca | pos. (32.7) | neg. | neg. | <i>C. abortus/C. psittaci</i> |
| 738C | Carrion crow         | <i>Corvus corone</i>     | Zug         | ZG  | Choana | neg.        | n.d. | n.d. | N/A                           |
| 738K | Carrion crow         | <i>Corvus corone</i>     | Zug         | ZG  | Cloaca | neg.        | n.d. | n.d. | N/A                           |
| 739C | Carrion crow         | <i>Corvus corone</i>     | Zug         | ZG  | Choana | neg.        | n.d. | n.d. | N/A                           |
| 739K | Carrion crow         | <i>Corvus corone</i>     | Zug         | ZG  | Cloaca | neg.        | n.d. | n.d. | N/A                           |
| 740C | Carrion crow         | <i>Corvus corone</i>     | Zug         | ZG  | Choana | pos. (27.7) | neg. | neg. | <i>C. psittaci</i> 1V         |
| 740K | Carrion crow         | <i>Corvus corone</i>     | Zug         | ZG  | Cloaca | pos. (28.0) | neg. | neg. | <i>C. abortus/C. psittaci</i> |
| 741C | Carrion crow         | <i>Corvus corone</i>     | Zug         | ZG  | Choana | neg.        | n.d. | n.d. | N/A                           |
| 741K | Carrion crow         | <i>Corvus corone</i>     | Zug         | ZG  | Cloaca | neg.        | n.d. | n.d. | N/A                           |
| 742C | Carrion crow         | <i>Corvus corone</i>     | Zug         | ZG  | Choana | neg.        | n.d. | n.d. | N/A                           |
| 742K | Carrion crow         | <i>Corvus corone</i>     | Zug         | ZG  | Cloaca | neg.        | n.d. | n.d. | N/A                           |
| 743C | Carrion crow         | <i>Corvus corone</i>     | Zug         | ZG  | Choana | neg.        | n.d. | n.d. | N/A                           |
| 743K | Carrion crow         | <i>Corvus corone</i>     | Zug         | ZG  | Cloaca | neg.        | n.d. | n.d. | N/A                           |
| 744C | Carrion crow         | <i>Corvus corone</i>     | Zug         | ZG  | Choana | pos.(33.6)  | neg. | neg. | <i>C. abortus/C. psittaci</i> |
| 744K | Carrion crow         | <i>Corvus corone</i>     | Zug         | ZG  | Cloaca | neg.        | n.d. | n.d. | N/A                           |
| 745C | Carrion crow         | <i>Corvus corone</i>     | Zug         | ZG  | Choana | neg.        | n.d. | n.d. | N/A                           |
| 745K | Carrion crow         | <i>Corvus corone</i>     | Zug         | ZG  | Cloaca | neg.        | n.d. | n.d. | N/A                           |
| 746C | Carrion crow         | <i>Corvus corone</i>     | Zug         | ZG  | Choana | pos. (24.9) | neg. | neg. | <i>C. psittaci</i> 1V         |
| 746K | Carrion crow         | <i>Corvus corone</i>     | Zug         | ZG  | Cloaca | pos. (39.6) | neg. | neg. | Not identified                |
| 747C | Carrion crow         | <i>Corvus corone</i>     | Zug         | ZG  | Choana | neg.        | n.d. | n.d. | N/A                           |
| 747K | Carrion crow         | <i>Corvus corone</i>     | Zug         | ZG  | Cloaca | neg.        | n.d. | n.d. | N/A                           |
| 748C | Carrion crow         | <i>Corvus corone</i>     | Zug         | ZG  | Choana | neg.        | n.d. | n.d. | N/A                           |

|      |              |                      |     |    |        |              |      |      |                               |
|------|--------------|----------------------|-----|----|--------|--------------|------|------|-------------------------------|
| 748K | Carrion crow | <i>Corvus corone</i> | Zug | ZG | Cloaca | neg.         | n.d. | n.d. | N/A                           |
| 749C | Carrion crow | <i>Corvus corone</i> | Zug | ZG | Choana | pos. (39.6)  | neg. | neg. | Not identified                |
| 749K | Carrion crow | <i>Corvus corone</i> | Zug | ZG | Cloaca | neg.         | n.d. | n.d. | N/A                           |
| 750C | Carrion crow | <i>Corvus corone</i> | Zug | ZG | Choana | pos. (31.5)  | neg. | neg. | <i>C. abortus/C. psittaci</i> |
| 750K | Carrion crow | <i>Corvus corone</i> | Zug | ZG | Cloaca | pos. (31.5)  | neg. | neg. | <i>C. abortus/C. psittaci</i> |
| 751C | Carrion crow | <i>Corvus corone</i> | Zug | ZG | Choana | pos. (20.2)  | neg. | neg. | <i>C. psittaci</i> 1V         |
| 751K | Carrion crow | <i>Corvus corone</i> | Zug | ZG | Cloaca | pos. (27.7)  | neg. | neg. | <i>C. abortus/C. psittaci</i> |
| 752C | Carrion crow | <i>Corvus corone</i> | Zug | ZG | Choana | pos. (30.4)  | neg. | neg. | <i>C. psittaci</i> 1V         |
| 752K | Carrion crow | <i>Corvus corone</i> | Zug | ZG | Cloaca | pos. (33.0)  | neg. | neg. | <i>C. abortus/C. psittaci</i> |
| 753C | Carrion crow | <i>Corvus corone</i> | Zug | ZG | Choana | pos. (34.0)  | neg. | neg. | <i>C. abortus/C. psittaci</i> |
| 753K | Carrion crow | <i>Corvus corone</i> | Zug | ZG | Cloaca | neg.         | n.d. | n.d. | N/A                           |
| 754C | Carrion crow | <i>Corvus corone</i> | Zug | ZG | Choana | pos. (26.3)  | neg. | neg. | <i>C. abortus/C. psittaci</i> |
| 754K | Carrion crow | <i>Corvus corone</i> | Zug | ZG | Cloaca | pos. (29.3)  | neg. | neg. | Not identified                |
| 755C | Carrion crow | <i>Corvus corone</i> | Zug | ZG | Choana | pos. (36.7)  | neg. | neg. | Not identified                |
| 755K | Carrion crow | <i>Corvus corone</i> | Zug | ZG | Cloaca | pos. (37.5)  | neg. | neg. | Not identified                |
| 756C | Carrion crow | <i>Corvus corone</i> | Zug | ZG | Choana | pos. (34.0)  | neg. | neg. | <i>C. abortus/C. psittaci</i> |
| 756K | Carrion crow | <i>Corvus corone</i> | Zug | ZG | Cloaca | pos. (32.9)  | neg. | neg. | <i>C. abortus/C. psittaci</i> |
| 757C | Carrion crow | <i>Corvus corone</i> | Zug | ZG | Choana | pos. (37.28) | neg. | neg. | Not identified                |
| 757K | Carrion crow | <i>Corvus corone</i> | Zug | ZG | Cloaca | neg.         | n.d. | n.d. | N/A                           |
| 758C | Carrion crow | <i>Corvus corone</i> | Zug | ZG | Choana | neg.         | n.d. | n.d. | N/A                           |
| 758K | Carrion crow | <i>Corvus corone</i> | Zug | ZG | Cloaca | pos. (39.7)  | neg. | neg. | Not identified                |
| 759C | Carrion crow | <i>Corvus corone</i> | Zug | ZG | Choana | pos. (33.1)  | neg. | neg. | <i>C. abortus/C. psittaci</i> |
| 759K | Carrion crow | <i>Corvus corone</i> | Zug | ZG | Cloaca | neg.         | n.d. | n.d. | N/A                           |
| 760C | Carrion crow | <i>Corvus corone</i> | Zug | ZG | Choana | pos. (25.9)  | neg. | neg. | <i>C. abortus/C. psittaci</i> |
| 760K | Carrion crow | <i>Corvus corone</i> | Zug | ZG | Cloaca | pos. (31.9)  | neg. | neg. | <i>C. abortus/C. psittaci</i> |
| 761C | Carrion crow | <i>Corvus corone</i> | Zug | ZG | Choana | pos. (29.7)  | neg. | neg. | <i>C. psittaci</i> 1V         |
| 761K | Carrion crow | <i>Corvus corone</i> | Zug | ZG | Cloaca | neg.         | neg. | neg. | N/A                           |
| 762C | Carrion crow | <i>Corvus corone</i> | Zug | ZG | Choana | pos. (35.8)  | neg. | neg. | Not identified                |
| 762K | Carrion crow | <i>Corvus corone</i> | Zug | ZG | Cloaca | neg.         | n.d. | n.d. | N/A                           |
| 763C | Carrion crow | <i>Corvus corone</i> | Zug | ZG | Choana | neg.         | n.d. | n.d. | N/A                           |
| 763K | Carrion crow | <i>Corvus corone</i> | Zug | ZG | Cloaca | neg.         | n.d. | n.d. | N/A                           |
| 764C | Carrion crow | <i>Corvus corone</i> | Zug | ZG | Choana | pos. (33.9)  | neg. | neg. | <i>C. abortus/C. psittaci</i> |
| 764K | Carrion crow | <i>Corvus corone</i> | Zug | ZG | Cloaca | neg.         | n.d. | n.d. | N/A                           |
| 765C | Carrion crow | <i>Corvus corone</i> | Zug | ZG | Choana | pos. (33.6)  | neg. | neg. | <i>C. abortus/C. psittaci</i> |
| 765K | Carrion crow | <i>Corvus corone</i> | Zug | ZG | Cloaca | neg.         | n.d. | n.d. | N/A                           |
| 766C | Carrion crow | <i>Corvus corone</i> | Zug | ZG | Choana | neg.         | n.d. | n.d. | N/A                           |
| 766K | Carrion crow | <i>Corvus corone</i> | Zug | ZG | Cloaca | neg.         | n.d. | n.d. | N/A                           |
| 767C | Carrion crow | <i>Corvus corone</i> | Zug | ZG | Choana | neg.         | n.d. | n.d. | N/A                           |
| 767K | Carrion crow | <i>Corvus corone</i> | Zug | ZG | Cloaca | neg.         | n.d. | n.d. | N/A                           |
| 768C | Carrion crow | <i>Corvus corone</i> | Zug | ZG | Choana | neg.         | n.d. | n.d. | N/A                           |
| 768K | Carrion crow | <i>Corvus corone</i> | Zug | ZG | Cloaca | neg.         | n.d. | n.d. | N/A                           |
| 769C | Carrion crow | <i>Corvus corone</i> | Zug | ZG | Choana | pos. (24.6)  | neg. | neg. | <i>C. abortus/C. psittaci</i> |
| 769K | Carrion crow | <i>Corvus corone</i> | Zug | ZG | Cloaca | neg.         | n.d. | n.d. | N/A                           |

|      |                |                          |                  |    |        |                    |      |      |                               |
|------|----------------|--------------------------|------------------|----|--------|--------------------|------|------|-------------------------------|
| 770C | Carrion crow   | <i>Corvus corone</i>     | Zug              | ZG | Choana | pos. (31.2)        | neg. | neg. | <i>C. abortus/C. psittaci</i> |
| 770K | Carrion crow   | <i>Corvus corone</i>     | Zug              | ZG | Cloaca | neg.               | n.d. | n.d. | N/A                           |
| 771C | Carrion crow   | <i>Corvus corone</i>     | Zug              | ZG | Choana | neg.               | n.d. | n.d. | N/A                           |
| 771K | Carrion crow   | <i>Corvus corone</i>     | Zug              | ZG | Cloaca | neg.               | n.d. | n.d. | N/A                           |
| 772C | Carrion crow   | <i>Corvus corone</i>     | Zug              | ZG | Choana | pos. (29.9)        | neg. | neg. | <i>C. abortus/C. psittaci</i> |
| 772K | Carrion crow   | <i>Corvus corone</i>     | Zug              | ZG | Cloaca | pos. (26.8)        | neg. | neg. | <i>C. psittaci</i> 1V         |
| 773C | Carrion crow   | <i>Corvus corone</i>     | Zug              | ZG | Choana | pos. (31.0)        | neg. | neg. | <i>C. abortus/C. psittaci</i> |
| 773K | Carrion crow   | <i>Corvus corone</i>     | Zug              | ZG | Cloaca | pos. (37.4 (1:10)) | neg. | neg. | Not identified                |
| 774C | Carrion crow   | <i>Corvus corone</i>     | Zug              | ZG | Choana | pos. (31.9)        | neg. | neg. | <i>C. abortus/C. psittaci</i> |
| 774K | Carrion crow   | <i>Corvus corone</i>     | Zug              | ZG | Cloaca | neg.               | n.d. | n.d. | N/A                           |
| 775C | Carrion crow   | <i>Corvus corone</i>     | Zug              | ZG | Choana | neg.               | n.d. | n.d. | N/A                           |
| 775K | Carrion crow   | <i>Corvus corone</i>     | Zug              | ZG | Cloaca | neg.               | n.d. | n.d. | N/A                           |
| 776C | Carrion crow   | <i>Corvus corone</i>     | Zug              | ZG | Choana | neg.               | n.d. | n.d. | N/A                           |
| 776K | Carrion crow   | <i>Corvus corone</i>     | Zug              | ZG | Cloaca | neg.               | n.d. | n.d. | N/A                           |
| 777C | Carrion crow   | <i>Corvus corone</i>     | Zug              | ZG | Choana | neg.               | n.d. | n.d. | N/A                           |
| 777K | Carrion crow   | <i>Corvus corone</i>     | Zug              | ZG | Cloaca | neg.               | n.d. | n.d. | N/A                           |
| 778C | Carrion crow   | <i>Corvus corone</i>     | Zug              | ZG | Choana | neg.               | n.d. | n.d. | N/A                           |
| 778K | Carrion crow   | <i>Corvus corone</i>     | Zug              | ZG | Cloaca | neg.               | n.d. | n.d. | N/A                           |
| 779C | Carrion crow   | <i>Corvus corone</i>     | Zug              | ZG | Choana | neg.               | n.d. | n.d. | N/A                           |
| 779K | Carrion crow   | <i>Corvus corone</i>     | Zug              | ZG | Cloaca | neg.               | n.d. | n.d. | N/A                           |
| 780C | Common buzzard | <i>Buteo buteo</i>       | Zug              | ZG | Choana | neg.               | n.d. | n.d. | N/A                           |
| 780K | Common buzzard | <i>Buteo buteo</i>       | Zug              | ZG | Cloaca | neg.               | n.d. | n.d. | N/A                           |
| 781C | Common buzzard | <i>Buteo buteo</i>       | Zug              | ZG | Choana | neg.               | neg. | neg. | N/A                           |
| 782C | Common buzzard | <i>Buteo buteo</i>       | Zug              | ZG | Choana | neg.               | n.d. | n.d. | N/A                           |
| 782K | Common buzzard | <i>Buteo buteo</i>       | Zug              | ZG | Cloaca | neg.               | n.d. | n.d. | N/A                           |
| 783C | Common buzzard | <i>Buteo buteo</i>       | Zug              | ZG | Choana | neg.               | n.d. | n.d. | N/A                           |
| 783K | Common buzzard | <i>Buteo buteo</i>       | Zug              | ZG | Cloaca | neg.               | n.d. | n.d. | N/A                           |
| 784C | Common kestrel | <i>Falco tinnunculus</i> | 8610 Uster       | ZH | Choana | neg.               | n.d. | n.d. | N/A                           |
| 784K | Common kestrel | <i>Falco tinnunculus</i> | 8610 Uster       | ZH | Cloaca | neg.               | n.d. | n.d. | N/A                           |
| 785C | Red kite       | <i>Milvus milvus</i>     | Schaffhausen     | SH | Choana | neg.               | n.d. | n.d. | N/A                           |
| 785K | Red kite       | <i>Milvus milvus</i>     | Schaffhausen     | SH | Cloaca | neg.               | n.d. | n.d. | N/A                           |
| 796C | Long-eared owl | <i>Asio otus</i>         | Zürich Flughafen | ZH | Choana | neg.               | n.d. | n.d. | N/A                           |
| 796K | Long-eared owl | <i>Asio otus</i>         | Zürich Flughafen | ZH | Cloaca | neg.               | n.d. | n.d. | N/A                           |
| 797C | Carrion crow   | <i>Corvus corone</i>     | Zürich Flughafen | ZH | Choana | pos. (33.5)        | neg. | neg. | <i>C. abortus/C. psittaci</i> |
| 797K | Carrion crow   | <i>Corvus corone</i>     | Zürich Flughafen | ZH | Cloaca | pos. (33.6)        | neg. | neg. | <i>C. abortus/C. psittaci</i> |
| 798C | Carrion crow   | <i>Corvus corone</i>     | Zürich Flughafen | ZH | Choana | pos. (28.2)        | neg. | neg. | <i>C. abortus/C. psittaci</i> |
| 798K | Carrion crow   | <i>Corvus corone</i>     | Zürich Flughafen | ZH | Cloaca | pos. (26.7)        | neg. | neg. | <i>C. psittaci</i> 1V         |
| 799C | Carrion crow   | <i>Corvus corone</i>     | Zürich Flughafen | ZH | Choana | neg.               | n.d. | n.d. | N/A                           |
| 799K | Carrion crow   | <i>Corvus corone</i>     | Zürich Flughafen | ZH | Cloaca | neg.               | n.d. | n.d. | N/A                           |
| 800C | Carrion crow   | <i>Corvus corone</i>     | Zürich Flughafen | ZH | Choana | neg.               | n.d. | n.d. | N/A                           |
| 800K | Carrion crow   | <i>Corvus corone</i>     | Zürich Flughafen | ZH | Cloaca | neg.               | n.d. | n.d. | N/A                           |
| 801C | Carrion crow   | <i>Corvus corone</i>     | Zürich Flughafen | ZH | Choana | neg.               | n.d. | n.d. | N/A                           |
| 801K | Carrion crow   | <i>Corvus corone</i>     | Zürich Flughafen | ZH | Cloaca | neg.               | n.d. | n.d. | N/A                           |

|        |                 |                          |                         |    |        |             |      |      |                               |
|--------|-----------------|--------------------------|-------------------------|----|--------|-------------|------|------|-------------------------------|
| 802C   | Long-eared owl  | <i>Asio otus</i>         | Zürich Flughafen        | ZH | Choana | neg.        | n.d. | n.d. | N/A                           |
| 802K   | Long-eared owl  | <i>Asio otus</i>         | Zürich Flughafen        | ZH | Cloaca | neg.        | n.d. | n.d. | N/A                           |
| 803C   | Carrion crow    | <i>Corvus corone</i>     | Zürich Flughafen        | ZH | Choana | neg.        | n.d. | n.d. | N/A                           |
| 803K   | Carrion crow    | <i>Corvus corone</i>     | Zürich Flughafen        | ZH | Cloaca | neg.        | n.d. | n.d. | N/A                           |
| 804C   | Carrion crow    | <i>Corvus corone</i>     | Zürich Flughafen        | ZH | Choana | neg.        | n.d. | n.d. | N/A                           |
| 804K   | Carrion crow    | <i>Corvus corone</i>     | Zürich Flughafen        | ZH | Cloaca | neg.        | n.d. | n.d. | N/A                           |
| 805C   | Carrion crow    | <i>Corvus corone</i>     | Zürich Flughafen        | ZH | Choana | neg.        | n.d. | n.d. | N/A                           |
| 805K   | Carrion crow    | <i>Corvus corone</i>     | Zürich Flughafen        | ZH | Cloaca | neg.        | n.d. | n.d. | N/A                           |
| 806C   | Carrion crow    | <i>Corvus corone</i>     | Zürich Flughafen        | ZH | Choana | neg.        | n.d. | n.d. | N/A                           |
| 806K   | Carrion crow    | <i>Corvus corone</i>     | Zürich Flughafen        | ZH | Cloaca | neg.        | n.d. | n.d. | N/A                           |
| 807C   | Carrion crow    | <i>Corvus corone</i>     | Zürich Flughafen        | ZH | Choana | neg.        | n.d. | n.d. | N/A                           |
| 807K   | Carrion crow    | <i>Corvus corone</i>     | Zürich Flughafen        | ZH | Cloaca | neg.        | n.d. | n.d. | N/A                           |
| 808C   | Eurasian magpie | <i>Pica pica</i>         | Zürich Flughafen        | ZH | Choana | neg.        | n.d. | n.d. | N/A                           |
| 808K   | Eurasian magpie | <i>Pica pica</i>         | Zürich Flughafen        | ZH | Cloaca | neg.        | n.d. | n.d. | N/A                           |
| 809C   | Carrion crow    | <i>Corvus corone</i>     | Zürich Flughafen        | ZH | Choana | neg.        | n.d. | n.d. | N/A                           |
| 809K   | Carrion crow    | <i>Corvus corone</i>     | Zürich Flughafen        | ZH | Cloaca | neg.        | n.d. | n.d. | N/A                           |
| 810C   | Carrion crow    | <i>Corvus corone</i>     | Zürich Flughafen        | ZH | Choana | neg.        | n.d. | n.d. | N/A                           |
| 810K   | Carrion crow    | <i>Corvus corone</i>     | Zürich Flughafen        | ZH | Cloaca | neg.        | n.d. | n.d. | N/A                           |
| 811C   | Carrion crow    | <i>Corvus corone</i>     | Zürich Flughafen        | ZH | Choana | neg.        | n.d. | n.d. | N/A                           |
| 811K   | Carrion crow    | <i>Corvus corone</i>     | Zürich Flughafen        | ZH | Cloaca | neg.        | n.d. | n.d. | N/A                           |
| 812C   | Carrion crow    | <i>Corvus corone</i>     | Zürich Flughafen        | ZH | Choana | neg.        | n.d. | n.d. | N/A                           |
| 812K   | Carrion crow    | <i>Corvus corone</i>     | Zürich Flughafen        | ZH | Cloaca | neg.        | n.d. | n.d. | N/A                           |
| 813C   | Carrion crow    | <i>Corvus corone</i>     | Zürich Flughafen        | ZH | Choana | neg.        | n.d. | n.d. | N/A                           |
| 813K   | Carrion crow    | <i>Corvus corone</i>     | Zürich Flughafen        | ZH | Cloaca | neg.        | n.d. | n.d. | N/A                           |
| 814C   | Carrion crow    | <i>Corvus corone</i>     | Zürich Flughafen        | ZH | Choana | pos. (25.6) | neg. | neg. | <i>C. psittaci</i> 1V         |
| 814K   | Carrion crow    | <i>Corvus corone</i>     | Zürich Flughafen        | ZH | Cloaca | pos. (29.1) | neg. | neg. | <i>C. abortus/C. psittaci</i> |
| 815C   | Carrion crow    | <i>Corvus corone</i>     | Zürich Flughafen        | ZH | Choana | neg.        | n.d. | n.d. | N/A                           |
| 815K   | Carrion crow    | <i>Corvus corone</i>     | Zürich Flughafen        | ZH | Cloaca | neg.        | n.d. | n.d. | N/A                           |
| 816Kot | Common kestrel  | <i>Falco tinnunculus</i> | 3256 Bangerten          | BE | Feces  | neg.        | n.d. | n.d. | N/A                           |
| 817Kot | Tawny owl       | <i>Strix aluco</i>       | 3253 Schnottwil         | SO | Feces  | neg.        | n.d. | n.d. | N/A                           |
| 818C   | Long-eared owl  | <i>Asio otus</i>         | 3427 Utzenstorf         | BE | Choana | neg.        | n.d. | n.d. | N/A                           |
| 818K   | Long-eared owl  | <i>Asio otus</i>         | 3427 Utzenstorf         | BE | Cloaca | neg.        | n.d. | n.d. | N/A                           |
| 819C   | Carrion crow    | <i>Corvus corone</i>     | 3432 Lützelflüh         | BE | Choana | neg.        | n.d. | n.d. | N/A                           |
| 819K   | Carrion crow    | <i>Corvus corone</i>     | 3432 Lützelflüh         | BE | Cloaca | neg.        | n.d. | n.d. | N/A                           |
| 820C   | Eurasian hobby  | <i>Falco subbuteo</i>    | 4573 Lohn-<br>Ammansegg | SO | Choana | neg.        | n.d. | n.d. | N/A                           |
| 820K   | Eurasian hobby  | <i>Falco subbuteo</i>    | 4573 Lohn-<br>Ammansegg | SO | Cloaca | neg.        | n.d. | n.d. | N/A                           |
| 821C   | Black kite      | <i>Milvus migrans</i>    | 3603 Uetendorf          | BE | Choana | neg.        | n.d. | n.d. | N/A                           |
| 821K   | Black kite      | <i>Milvus migrans</i>    | 3603 Uetendorf          | BE | Cloaca | neg.        | n.d. | n.d. | N/A                           |
| 824C   | Carrion crow    | <i>Corvus corone</i>     | Zürich Flughafen        | ZH | Choana | neg.        | n.d. | n.d. | N/A                           |
| 824K   | Carrion crow    | <i>Corvus corone</i>     | Zürich Flughafen        | ZH | Cloaca | neg.        | n.d. | n.d. | N/A                           |
| 825C   | Carrion crow    | <i>Corvus corone</i>     | Zürich Flughafen        | ZH | Choana | neg.        | n.d. | n.d. | N/A                           |



|      |                      |                            |                  |     |        |             |      |      |                               |
|------|----------------------|----------------------------|------------------|-----|--------|-------------|------|------|-------------------------------|
| 847C | Carrion crow         | <i>Corvus corone</i>       | Zürich Flughafen | ZH  | Choana | pos. (33.0) | neg. | neg. | <i>C. abortus/C. psittaci</i> |
| 847K | Carrion crow         | <i>Corvus corone</i>       | Zürich Flughafen | ZH  | Cloaca | neg.        | n.d. | n.d. | N/A                           |
| 848C | Carrion crow         | <i>Corvus corone</i>       | Zürich Flughafen | ZH  | Choana | pos. (26.6) | neg. | neg. | <i>C. psittaci</i> D          |
| 848K | Carrion crow         | <i>Corvus corone</i>       | Zürich Flughafen | ZH  | Cloaca | neg.        | n.d. | n.d. | N/A                           |
| 849C | Carrion crow         | <i>Corvus corone</i>       | Zürich Flughafen | ZH  | Choana | pos. (39.1) | neg. | neg. | Not identified                |
| 849K | Carrion crow         | <i>Corvus corone</i>       | Zürich Flughafen | ZH  | Cloaca | pos. (38.4) | neg. | neg. | Not identified                |
| 850C | Carrion crow         | <i>Corvus corone</i>       | Zürich Flughafen | ZH  | Choana | pos. (28.5) | neg. | neg. | <i>C. abortus/C. psittaci</i> |
| 850K | Carrion crow         | <i>Corvus corone</i>       | Zürich Flughafen | ZH  | Cloaca | pos. (27.9) | neg. | neg. | <i>C. psittaci</i> 1V         |
| 851C | Carrion crow         | <i>Corvus corone</i>       | Zürich Flughafen | ZH  | Choana | pos. (31.9) | neg. | neg. | <i>C. abortus/C. psittaci</i> |
| 851K | Carrion crow         | <i>Corvus corone</i>       | Zürich Flughafen | ZH  | Cloaca | neg.        | n.d. | n.d. | N/A                           |
| 852C | Carrion crow         | <i>Corvus corone</i>       | Zürich Flughafen | ZH  | Choana | neg.        | n.d. | n.d. | N/A                           |
| 852K | Carrion crow         | <i>Corvus corone</i>       | Zürich Flughafen | ZH  | Cloaca | neg.        | n.d. | n.d. | N/A                           |
| 853C | Carrion crow         | <i>Corvus corone</i>       | Zürich Flughafen | ZH  | Choana | pos. (34.6) | neg. | neg. | Not identified                |
| 853K | Carrion crow         | <i>Corvus corone</i>       | Zürich Flughafen | ZH  | Cloaca | neg.        | n.d. | n.d. | N/A                           |
| 854C | Carrion crow         | <i>Corvus corone</i>       | Zürich Flughafen | ZH  | Choana | neg.        | n.d. | n.d. | N/A                           |
| 854K | Carrion crow         | <i>Corvus corone</i>       | Zürich Flughafen | ZH  | Cloaca | neg.        | n.d. | n.d. | N/A                           |
| 855C | Eurasian sparrowhawk | <i>Accipiter nisus</i>     | Zürich Flughafen | ZH  | Choana | neg.        | n.d. | n.d. | N/A                           |
| 855K | Eurasian sparrowhawk | <i>Accipiter nisus</i>     | Zürich Flughafen | ZH  | Cloaca | neg.        | n.d. | n.d. | N/A                           |
| 856C | Carrion crow         | <i>Corvus corone</i>       | Zürich Flughafen | ZH  | Choana | pos. (29.3) | neg. | neg. | <i>C. psittaci</i> 1V         |
| 856K | Carrion crow         | <i>Corvus corone</i>       | Zürich Flughafen | ZH  | Cloaca | pos. (42.5) | neg. | neg. | Not identified                |
| 857C | Carrion crow         | <i>Corvus corone</i>       | Zürich Flughafen | ZH  | Choana | pos. (39.6) | neg. | neg. | Not identified                |
| 857K | Carrion crow         | <i>Corvus corone</i>       | Zürich Flughafen | ZH  | Cloaca | pos. (33.9) | neg. | neg. | Not identified                |
| 858C | Carrion crow         | <i>Corvus corone</i>       | Zürich Flughafen | ZH  | Choana | pos. (27.8) | neg. | neg. | <i>C. psittaci</i> 1V         |
| 858K | Carrion crow         | <i>Corvus corone</i>       | Zürich Flughafen | ZH  | Cloaca | pos. (32.3) | neg. | neg. | <i>C. abortus/C. psittaci</i> |
| 859C | Common kestrel       | <i>Falco tinnunculus</i>   | Zürich Flughafen | ZH  | Choana | neg.        | n.d. | n.d. | N/A                           |
| 859K | Common kestrel       | <i>Falco tinnunculus</i>   | Zürich Flughafen | ZH  | Cloaca | neg.        | n.d. | n.d. | N/A                           |
| 860C | Long-eared owl       | <i>Asio otus</i>           | 6042 Dietwil     | AG  | Choana | neg.        | n.d. | n.d. | N/A                           |
| 860K | Long-eared owl       | <i>Asio otus</i>           | 6042 Dietwil     | AG  | Cloaca | neg.        | n.d. | n.d. | N/A                           |
| 861C | Carrion crow         | <i>Corvus corone</i>       | Unknown          | N/A | Choana | pos. (22.4) | neg. | neg. | <i>C. abortus/C. psittaci</i> |
| 861K | Carrion crow         | <i>Corvus corone</i>       | Unknown          | N/A | Cloaca | pos. (23.6) | neg. | neg. | <i>C. psittaci</i> 1V         |
| 862C | Eurasian jay         | <i>Garrulus glandarius</i> | Unknown          | N/A | Choana | neg.        | n.d. | n.d. | N/A                           |
| 862K | Eurasian jay         | <i>Garrulus glandarius</i> | Unknown          | N/A | Cloaca | neg.        | n.d. | n.d. | N/A                           |
| 863C | Common buzzard       | <i>Buteo buteo</i>         | Unknown          | N/A | Choana | neg.        | n.d. | n.d. | N/A                           |
| 863K | Common buzzard       | <i>Buteo buteo</i>         | Unknown          | N/A | Cloaca | neg.        | n.d. | n.d. | N/A                           |
| 864C | Common buzzard       | <i>Buteo buteo</i>         | 3474 Wynigen     | BE  | Choana | neg.        | n.d. | n.d. | N/A                           |
| 864K | Common buzzard       | <i>Buteo buteo</i>         | 3474 Wynigen     | BE  | Cloaca | neg.        | n.d. | n.d. | N/A                           |
| 865C | Long-eared owl       | <i>Asio otus</i>           | 6026 Rain        | LU  | Choana | neg.        | n.d. | n.d. | N/A                           |
| 866C | Carrion crow         | <i>Corvus corone</i>       | 6023 Rothenburg  | LU  | Choana | neg.        | n.d. | n.d. | N/A                           |
| 867C | Common buzzard       | <i>Buteo buteo</i>         | Unknown          | N/A | Choana | neg.        | n.d. | n.d. | N/A                           |
| 867K | Common buzzard       | <i>Buteo buteo</i>         | Unknown          | N/A | Cloaca | neg.        | n.d. | n.d. | N/A                           |
| 868C | Common buzzard       | <i>Buteo buteo</i>         | Unknown          | N/A | Choana | neg.        | n.d. | n.d. | N/A                           |
| 868K | Common buzzard       | <i>Buteo buteo</i>         | Unknown          | N/A | Cloaca | neg.        | n.d. | n.d. | N/A                           |
| 869C | Common kestrel       | <i>Falco tinnunculus</i>   | Unknown          | N/A | Choana | neg.        | n.d. | n.d. | N/A                           |

|      |                      |                          |                       |     |        |             |      |      |                        |
|------|----------------------|--------------------------|-----------------------|-----|--------|-------------|------|------|------------------------|
| 869K | Common kestrel       | <i>Falco tinnunculus</i> | Unknown               | N/A | Cloaca | neg.        | n.d. | n.d. | N/A                    |
| 870C | Common kestrel       | <i>Falco tinnunculus</i> | Unknown               | N/A | Choana | neg.        | n.d. | n.d. | N/A                    |
| 870K | Common kestrel       | <i>Falco tinnunculus</i> | Unknown               | N/A | Cloaca | neg.        | n.d. | n.d. | N/A                    |
| 871C | Common kestrel       | <i>Falco tinnunculus</i> | 3267 Seedorf          | BE  | Choana | neg.        | n.d. | n.d. | N/A                    |
| 871K | Common kestrel       | <i>Falco tinnunculus</i> | 3267 Seedorf          | BE  | Cloaca | neg.        | n.d. | n.d. | N/A                    |
| 872C | Eurasian sparrowhawk | <i>Accipiter nisus</i>   | 2542 Pieterlen        | BE  | Choana | neg.        | n.d. | n.d. | N/A                    |
| 872K | Eurasian sparrowhawk | <i>Accipiter nisus</i>   | 2542 Pieterlen        | BE  | Cloaca | neg.        | n.d. | n.d. | N/A                    |
| 873C | Common kestrel       | <i>Falco tinnunculus</i> |                       |     | Choana | neg.        | n.d. | n.d. | N/A                    |
| 873K | Common kestrel       | <i>Falco tinnunculus</i> |                       |     | Cloaca | neg.        | n.d. | n.d. | N/A                    |
| 874C | Tawny owl            | <i>Strix aluco</i>       | Unknown               | N/A | Choana | neg.        | n.d. | n.d. | N/A                    |
| 874K | Tawny owl            | <i>Strix aluco</i>       | Unknown               | N/A | Cloaca | neg.        | n.d. | n.d. | N/A                    |
| 875C | Eurasian sparrowhawk | <i>Accipiter nisus</i>   | Unknown               | N/A | Choana | neg.        | n.d. | n.d. | N/A                    |
| 875K | Eurasian sparrowhawk | <i>Accipiter nisus</i>   | Unknown               | N/A | Cloaca | neg.        | n.d. | n.d. | N/A                    |
| 876C | Tawny owl            | <i>Strix aluco</i>       | 3412 Heimiswil        | BE  | Choana | neg.        | n.d. | n.d. | N/A                    |
| 876K | Tawny owl            | <i>Strix aluco</i>       | 3412 Heimiswil        | BE  | Cloaca | neg.        | n.d. | n.d. | N/A                    |
| 877C | Long-eared owl       | <i>Asio otus</i>         | 3360 Herzogenbuchsee  | BE  | Choana | pos. (34.0) | neg. | neg. | Not identified         |
| 877K | Long-eared owl       | <i>Asio otus</i>         | 3360 Herzogenbuchsee  | BE  | Cloaca | pos. (31.3) | neg. | neg. | <i>C. psittaci</i> M56 |
| 878C | Common buzzard       | <i>Buteo buteo</i>       | 3315 Bätterkinden     | BE  | Choana | neg.        | n.d. | n.d. | N/A                    |
| 878K | Common buzzard       | <i>Buteo buteo</i>       | 3315 Bätterkinden     | BE  | Cloaca | neg.        | n.d. | n.d. | N/A                    |
| 879C | Common buzzard       | <i>Buteo buteo</i>       | 4614 Hägendorf        | SO  | Choana | neg.        | n.d. | n.d. | N/A                    |
| 879K | Common buzzard       | <i>Buteo buteo</i>       | 4614 Hägendorf        | SO  | Cloaca | neg.        | n.d. | n.d. | N/A                    |
| 880C | Common buzzard       | <i>Buteo buteo</i>       | 3628 Uttigen          | BE  | Choana | neg.        | n.d. | n.d. | N/A                    |
| 880K | Common buzzard       | <i>Buteo buteo</i>       | 3628 Uttigen          | BE  | Cloaca | neg.        | n.d. | n.d. | N/A                    |
| 881C | Common buzzard       | <i>Buteo buteo</i>       | 3380 Wangen a.d. Aare | BE  | Choana | neg.        | n.d. | n.d. | N/A                    |
| 881K | Common buzzard       | <i>Buteo buteo</i>       | 3380 Wangen a.d. Aare | BE  | Cloaca | neg.        | n.d. | n.d. | N/A                    |
| 882C | Carrion crow         | <i>Corvus corone</i>     | 3007 Bern             | BE  | Choana | neg.        | n.d. | n.d. | N/A                    |
| 882K | Carrion crow         | <i>Corvus corone</i>     | 3007 Bern             | BE  | Cloaca | neg.        | n.d. | n.d. | N/A                    |
| 883C | Carrion crow         | <i>Corvus corone</i>     | 3366 Bollodingen      | BE  | Choana | neg.        | n.d. | n.d. | N/A                    |
| 883K | Carrion crow         | <i>Corvus corone</i>     | 3366 Bollodingen      | BE  | Cloaca | neg.        | n.d. | n.d. | N/A                    |
| 884C | Eurasian sparrowhawk | <i>Accipiter nisus</i>   | Unknown               | N/A | Choana | neg.        | n.d. | n.d. | N/A                    |
| 884K | Eurasian sparrowhawk | <i>Accipiter nisus</i>   | Unknown               | N/A | Cloaca | neg.        | n.d. | n.d. | N/A                    |
| 885C | Common kestrel       | <i>Falco tinnunculus</i> | 3317 Mülchi           | BE  | Choana | neg.        | n.d. | n.d. | N/A                    |
| 885K | Common kestrel       | <i>Falco tinnunculus</i> | 3317 Mülchi           | BE  | Cloaca | neg.        | n.d. | n.d. | N/A                    |
| 886C | Barn owl             | <i>Tyto alba</i>         | 4586 Kyburg-Buchegg   | SO  | Choana | neg.        | n.d. | n.d. | N/A                    |
| 886K | Barn owl             | <i>Tyto alba</i>         | 4586 Kyburg-Buchegg   | SO  | Cloaca | neg.        | n.d. | n.d. | N/A                    |
| 887C | Common kestrel       | <i>Falco tinnunculus</i> | 4554 Etziken          | SO  | Choana | neg.        | n.d. | n.d. | N/A                    |
| 887K | Common kestrel       | <i>Falco tinnunculus</i> | 4554 Etziken          | SO  | Cloaca | neg.        | n.d. | n.d. | N/A                    |
| 888C | Common kestrel       | <i>Falco tinnunculus</i> | 4710 Balsthal         | SO  | Choana | neg.        | n.d. | n.d. | N/A                    |
| 888K | Common kestrel       | <i>Falco tinnunculus</i> | 4710 Balsthal         | SO  | Cloaca | neg.        | n.d. | n.d. | N/A                    |
| 889C | Eurasian sparrowhawk | <i>Accipiter nisus</i>   | Unknown               | N/A | Choana | neg.        | n.d. | n.d. | N/A                    |
| 889K | Eurasian sparrowhawk | <i>Accipiter nisus</i>   | Unknown               | N/A | Cloaca | neg.        | n.d. | n.d. | N/A                    |



|      |                      |                          |                     |     |        |             |      |      |                |
|------|----------------------|--------------------------|---------------------|-----|--------|-------------|------|------|----------------|
| 890C | Eurasian sparrowhawk | <i>Accipiter nisus</i>   | Unknown             | N/A | Choana | neg.        | n.d. | n.d. | N/A            |
| 890K | Eurasian sparrowhawk | <i>Accipiter nisus</i>   | Unknown             | N/A | Cloaca | neg.        | n.d. | n.d. | N/A            |
| 891C | Barn owl             | <i>Tyto alba</i>         | 3365 Seeberg        | BE  | Choana | neg.        | n.d. | n.d. | N/A            |
| 891K | Barn owl             | <i>Tyto alba</i>         | 3365 Seeberg        | BE  | Cloaca | neg.        | n.d. | n.d. | N/A            |
| 892C | Long-eared owl       | <i>Asio otus</i>         | Unknown             | N/A | Choana | neg.        | n.d. | n.d. | N/A            |
| 892K | Long-eared owl       | <i>Asio otus</i>         | Unknown             | N/A | Cloaca | neg.        | n.d. | n.d. | N/A            |
| 893C | Eurasian sparrowhawk | <i>Accipiter nisus</i>   | 3428 Wiler          | BE  | Choana | neg.        | n.d. | n.d. | N/A            |
| 893K | Eurasian sparrowhawk | <i>Accipiter nisus</i>   | 3428 Wiler          | BE  | Cloaca | neg.        | n.d. | n.d. | N/A            |
| 894C | Long-eared owl       | <i>Asio otus</i>         | 3251 Wengi          | BE  | Choana | neg.        | n.d. | n.d. | N/A            |
| 894K | Long-eared owl       | <i>Asio otus</i>         | 3251 Wengi          | BE  | Cloaca | neg.        | n.d. | n.d. | N/A            |
| 895C | Common kestrel       | <i>Falco tinnunculus</i> | Unknown             | N/A | Choana | neg.        | n.d. | n.d. | N/A            |
| 895K | Common kestrel       | <i>Falco tinnunculus</i> | Unknown             | N/A | Cloaca | neg.        | n.d. | n.d. | N/A            |
| 896C | Common kestrel       | <i>Falco tinnunculus</i> | 3473 Alchenstorf    | BE  | Choana | neg.        | n.d. | n.d. | N/A            |
| 896K | Common kestrel       | <i>Falco tinnunculus</i> | 3473 Alchenstorf    | BE  | Cloaca | neg.        | n.d. | n.d. | N/A            |
| 897C | Common kestrel       | <i>Falco tinnunculus</i> | Unknown             | N/A | Choana | neg.        | n.d. | n.d. | N/A            |
| 897K | Common kestrel       | <i>Falco tinnunculus</i> | Unknown             | N/A | Cloaca | neg.        | n.d. | n.d. | N/A            |
| 898C | Common kestrel       | <i>Falco tinnunculus</i> | 3314 Schalunen      | BE  | Choana | neg.        | n.d. | n.d. | N/A            |
| 898K | Common kestrel       | <i>Falco tinnunculus</i> | 3314 Schalunen      | BE  | Cloaca | neg.        | n.d. | n.d. | N/A            |
| 899C | Common kestrel       | <i>Falco tinnunculus</i> | 3110 Münsingen      | BE  | Choana | neg.        | n.d. | n.d. | N/A            |
| 899K | Common kestrel       | <i>Falco tinnunculus</i> | 3110 Münsingen      | BE  | Cloaca | neg.        | n.d. | n.d. | N/A            |
| 900C | Common kestrel       | <i>Falco tinnunculus</i> | 3365 Seeberg        | BE  | Choana | neg.        | n.d. | n.d. | N/A            |
| 900K | Common kestrel       | <i>Falco tinnunculus</i> | 3365 Seeberg        | BE  | Cloaca | neg.        | n.d. | n.d. | N/A            |
| 901C | Common kestrel       | <i>Falco tinnunculus</i> | Unknown             | N/A | Choana | neg.        | n.d. | n.d. | N/A            |
| 901K | Common kestrel       | <i>Falco tinnunculus</i> | Unknown             | N/A | Cloaca | neg.        | n.d. | n.d. | N/A            |
| 902C | Common kestrel       | <i>Falco tinnunculus</i> | 3422 Kirchberg      | BE  | Choana | neg.        | n.d. | n.d. | N/A            |
| 902K | Common kestrel       | <i>Falco tinnunculus</i> | 3422 Kirchberg      | BE  | Cloaca | neg.        | n.d. | n.d. | N/A            |
| 903C | Common buzzard       | <i>Buteo buteo</i>       | 3006 Bern           | BE  | Choana | neg.        | n.d. | n.d. | N/A            |
| 903K | Common buzzard       | <i>Buteo buteo</i>       | 3006 Bern           | BE  | Cloaca | neg.        | n.d. | n.d. | N/A            |
| 904C | Barn owl             | <i>Tyto alba</i>         | 3273 Kappelen       | BE  | Choana | neg.        | n.d. | n.d. | N/A            |
| 904K | Barn owl             | <i>Tyto alba</i>         | 3273 Kappelen       | BE  | Cloaca | neg.        | n.d. | n.d. | N/A            |
| 905C | Common kestrel       | <i>Falco tinnunculus</i> | 5463 Wislikofen     | AG  | Choana | neg.        | n.d. | n.d. | N/A            |
| 905K | Common kestrel       | <i>Falco tinnunculus</i> | 5463 Wislikofen     | AG  | Cloaca | neg.        | n.d. | n.d. | N/A            |
| 906C | Eurasian sparrowhawk | <i>Accipiter nisus</i>   | 3400 Burgdorf       | BE  | Choana | neg.        | n.d. | n.d. | N/A            |
| 906K | Eurasian sparrowhawk | <i>Accipiter nisus</i>   | 3400 Burgdorf       | BE  | Cloaca | neg.        | n.d. | n.d. | N/A            |
| 907C | Common buzzard       | <i>Buteo buteo</i>       | 3422 Kirchberg      | BE  | Choana | neg.        | n.d. | n.d. | N/A            |
| 907K | Common buzzard       | <i>Buteo buteo</i>       | 3422 Kirchberg      | BE  | Cloaca | neg.        | n.d. | n.d. | N/A            |
| 908C | Common buzzard       | <i>Buteo buteo</i>       | 4553 Subingen       | SO  | Choana | neg.        | n.d. | n.d. | N/A            |
| 908K | Common buzzard       | <i>Buteo buteo</i>       | 4553 Subingen       | SO  | Cloaca | neg.        | n.d. | n.d. | N/A            |
| 909C | Red kite             | <i>Milvus milvus</i>     | 3295 Rüti bei Büren | BE  | Choana | neg.        | n.d. | n.d. | N/A            |
| 909K | Red kite             | <i>Milvus milvus</i>     | 3295 Rüti bei Büren | BE  | Cloaca | neg.        | n.d. | n.d. | N/A            |
| 910C | Common buzzard       | <i>Buteo buteo</i>       | Unknown             | N/A | Choana | neg.        | n.d. | n.d. | N/A            |
| 910K | Common buzzard       | <i>Buteo buteo</i>       | Unknown             | N/A | Cloaca | pos. (41.2) | neg. | neg. | Not identified |
| 911C | Eurasian sparrowhawk | <i>Accipiter nisus</i>   | Unknown             | N/A | Choana | neg.        | n.d. | n.d. | N/A            |

|      |                      |                          |                               |     |        |      |      |      |     |
|------|----------------------|--------------------------|-------------------------------|-----|--------|------|------|------|-----|
| 911K | Eurasian sparrowhawk | <i>Accipiter nisus</i>   | Unknown                       | N/A | Cloaca | neg. | n.d. | n.d. | N/A |
| 912C | Common kestrel       | <i>Falco tinnunculus</i> | Unknown                       | N/A | Choana | neg. | n.d. | n.d. | N/A |
| 912K | Common kestrel       | <i>Falco tinnunculus</i> | Unknown                       | N/A | Cloaca | neg. | n.d. | n.d. | N/A |
| 913C | Common buzzard       | <i>Buteo buteo</i>       | 4713 Matzendorf               | SO  | Choana | neg. | n.d. | n.d. | N/A |
| 913K | Common buzzard       | <i>Buteo buteo</i>       | 4713 Matzendorf               | SO  | Cloaca | neg. | n.d. | n.d. | N/A |
| 914C | Common buzzard       | <i>Buteo buteo</i>       | Unknown                       | N/A | Choana | neg. | n.d. | n.d. | N/A |
| 914K | Common buzzard       | <i>Buteo buteo</i>       | Unknown                       | N/A | Cloaca | neg. | n.d. | n.d. | N/A |
| 926C | Bearded vulture      | <i>Gypaetus barbatus</i> | 7522 La Punt-Chamues-ch       | GR  | Choana | neg. | n.d. | n.d. | N/A |
| 926K | Bearded vulture      | <i>Gypaetus barbatus</i> | 7522 La Punt-Chamues-ch       | GR  | Cloaca | neg. | n.d. | n.d. | N/A |
| 927C | Golden eagle         | <i>Aquila chrysaetos</i> | 7463 Surses                   | GR  | Choana | neg. | n.d. | n.d. | N/A |
| 927K | Golden eagle         | <i>Aquila chrysaetos</i> | 7463 Surses                   | GR  | Cloaca | neg. | n.d. | n.d. | N/A |
| 928C | Golden eagle         | <i>Aquila chrysaetos</i> | 7165 Breil                    | GR  | Choana | neg. | n.d. | n.d. | N/A |
| 928K | Golden eagle         | <i>Aquila chrysaetos</i> | 7165 Breil                    | GR  | Cloaca | neg. | n.d. | n.d. | N/A |
| 929K | Golden eagle         | <i>Aquila chrysaetos</i> | 7156 Pigniu                   | GR  | Cloaca | neg. | n.d. | n.d. | N/A |
| 930C | Golden eagle         | <i>Aquila chrysaetos</i> | 7608 Castasegna               | GR  | Choana | neg. | n.d. | n.d. | N/A |
| 930K | Golden eagle         | <i>Aquila chrysaetos</i> | 7608 Castasegna               | GR  | Cloaca | neg. | n.d. | n.d. | N/A |
| 931C | Eurasian eagle-owl   | <i>Asio otus</i>         | 7304 Maienfeld                | GR  | Choana | neg. | n.d. | n.d. | N/A |
| 931K | Eurasian eagle-owl   | <i>Asio otus</i>         | 7304 Maienfeld                | GR  | Cloaca | neg. | n.d. | n.d. | N/A |
| 932C | Eurasian eagle-owl   | <i>Asio otus</i>         | 6565 Lumbreida San Bernardino | GR  | Choana | neg. | n.d. | n.d. | N/A |
| 932K | Eurasian eagle-owl   | <i>Asio otus</i>         | 6565 Lumbreida San Bernardino | GR  | Cloaca | neg. | n.d. | n.d. | N/A |
| 933K | Golden eagle         | <i>Aquila chrysaetos</i> | 6534 San Vittore              | GR  | Cloaca | neg. | n.d. | n.d. | N/A |
| 934C | Eurasian eagle-owl   | <i>Asio otus</i>         | 8752 Näfels                   | GL  | Choana | neg. | n.d. | n.d. | N/A |
| 934K | Eurasian eagle-owl   | <i>Asio otus</i>         | 8752 Näfels                   | GL  | Cloaca | neg. | n.d. | n.d. | N/A |
| 935C | Hooded crow          | <i>Corvus cornix</i>     | 7130 Ilanz/Glion              | GR  | Choana | neg. | n.d. | n.d. | N/A |
| 935K | Hooded crow          | <i>Corvus cornix</i>     | 7130 Ilanz/Glion              | GR  | Cloaca | neg. | n.d. | n.d. | N/A |
| 945C | Carrion crow         | <i>Corvus corone</i>     | 1294 Genthod                  | GE  | Choana | neg. | n.d. | n.d. | N/A |
| 945K | Carrion crow         | <i>Corvus corone</i>     | 1294 Genthod                  | GE  | Cloaca | neg. | n.d. | n.d. | N/A |
| 946C | Carrion crow         | <i>Corvus corone</i>     | 1294 Genthod                  | GE  | Choana | neg. | n.d. | n.d. | N/A |
| 946K | Carrion crow         | <i>Corvus corone</i>     | 1294 Genthod                  | GE  | Cloaca | neg. | n.d. | n.d. | N/A |
| 947C | Carrion crow         | <i>Corvus corone</i>     | 1294 Genthod                  | GE  | Choana | neg. | n.d. | n.d. | N/A |
| 947K | Carrion crow         | <i>Corvus corone</i>     | 1294 Genthod                  | GE  | Cloaca | neg. | n.d. | n.d. | N/A |
| 948C | Carrion crow         | <i>Corvus corone</i>     | 1294 Genthod                  | GE  | Choana | neg. | n.d. | n.d. | N/A |
| 948K | Carrion crow         | <i>Corvus corone</i>     | 1294 Genthod                  | GE  | Cloaca | neg. | n.d. | n.d. | N/A |
| 949C | Carrion crow         | <i>Corvus corone</i>     | 1294 Genthod                  | GE  | Choana | neg. | n.d. | n.d. | N/A |
| 949K | Carrion crow         | <i>Corvus corone</i>     | 1294 Genthod                  | GE  | Cloaca | neg. | n.d. | n.d. | N/A |
| 950C | Carrion crow         | <i>Corvus corone</i>     | 1294 Genthod                  | GE  | Choana | neg. | n.d. | n.d. | N/A |
| 950K | Carrion crow         | <i>Corvus corone</i>     | 1294 Genthod                  | GE  | Cloaca | neg. | n.d. | n.d. | N/A |
| 951C | Carrion crow         | <i>Corvus corone</i>     | 1294 Genthod                  | GE  | Choana | neg. | n.d. | n.d. | N/A |
| 951K | Carrion crow         | <i>Corvus corone</i>     | 1294 Genthod                  | GE  | Cloaca | neg. | n.d. | n.d. | N/A |

|      |                      |                           |              |     |        |             |      |      |                |
|------|----------------------|---------------------------|--------------|-----|--------|-------------|------|------|----------------|
| 952C | Carrion crow         | <i>Corvus corone</i>      | 1294 Genthod | GE  | Choana | neg.        | n.d. | n.d. | N/A            |
| 952K | Carrion crow         | <i>Corvus corone</i>      | 1294 Genthod | GE  | Cloaca | neg.        | n.d. | n.d. | N/A            |
| 953C | Carrion crow         | <i>Corvus corone</i>      | 1294 Genthod | GE  | Choana | neg.        | n.d. | n.d. | N/A            |
| 953K | Carrion crow         | <i>Corvus corone</i>      | 1294 Genthod | GE  | Cloaca | neg.        | n.d. | n.d. | N/A            |
| 954C | Carrion crow         | <i>Corvus corone</i>      | 1294 Genthod | GE  | Choana | neg.        | n.d. | n.d. | N/A            |
| 954K | Carrion crow         | <i>Corvus corone</i>      | 1294 Genthod | GE  | Cloaca | neg.        | n.d. | n.d. | N/A            |
| 955C | Carrion crow         | <i>Corvus corone</i>      | 1294 Genthod | GE  | Choana | neg.        | n.d. | n.d. | N/A            |
| 955K | Carrion crow         | <i>Corvus corone</i>      | 1294 Genthod | GE  | Cloaca | neg.        | n.d. | n.d. | N/A            |
| 956C | Carrion crow         | <i>Corvus corone</i>      | 1294 Genthod | GE  | Choana | neg.        | n.d. | n.d. | N/A            |
| 956K | Carrion crow         | <i>Corvus corone</i>      | 1294 Genthod | GE  | Cloaca | neg.        | n.d. | n.d. | N/A            |
| 957C | Carrion crow         | <i>Corvus corone</i>      | 1294 Genthod | GE  | Choana | neg.        | n.d. | n.d. | N/A            |
| 957K | Carrion crow         | <i>Corvus corone</i>      | 1294 Genthod | GE  | Cloaca | neg.        | n.d. | n.d. | N/A            |
| 958C | Carrion crow         | <i>Corvus corone</i>      | 1294 Genthod | GE  | Choana | neg.        | n.d. | n.d. | N/A            |
| 958K | Carrion crow         | <i>Corvus corone</i>      | 1294 Genthod | GE  | Cloaca | neg.        | n.d. | n.d. | N/A            |
| 959C | Carrion crow         | <i>Corvus corone</i>      | 1294 Genthod | GE  | Choana | neg.        | n.d. | n.d. | N/A            |
| 959K | Carrion crow         | <i>Corvus corone</i>      | 1294 Genthod | GE  | Cloaca | neg.        | n.d. | n.d. | N/A            |
| 960C | Carrion crow         | <i>Corvus corone</i>      | 1786 Sugiez  | FR  | Choana | neg.        | n.d. | n.d. | N/A            |
| 960K | Carrion crow         | <i>Corvus corone</i>      | 1786 Sugiez  | FR  | Cloaca | neg.        | n.d. | n.d. | N/A            |
| 961K | Carrion crow         | <i>Corvus corone</i>      | 1786 Sugiez  | FR  | Cloaca | neg.        | n.d. | n.d. | N/A            |
| 962C | Carrion crow         | <i>Corvus corone</i>      | 1786 Sugiez  | FR  | Choana | neg.        | n.d. | n.d. | N/A            |
| 963C | Carrion crow         | <i>Corvus corone</i>      | 1786 Sugiez  | FR  | Choana | neg.        | n.d. | n.d. | N/A            |
| 964C | Carrion crow         | <i>Corvus corone</i>      | 1786 Sugiez  | FR  | Choana | neg.        | n.d. | n.d. | N/A            |
| 964K | Carrion crow         | <i>Corvus corone</i>      | 1786 Sugiez  | FR  | Cloaca | neg.        | n.d. | n.d. | N/A            |
| 965C | Carrion crow         | <i>Corvus corone</i>      | 1786 Sugiez  | FR  | Choana | neg.        | n.d. | n.d. | N/A            |
| 965K | Carrion crow         | <i>Corvus corone</i>      | 1786 Sugiez  | FR  | Cloaca | neg.        | n.d. | n.d. | N/A            |
| 966C | Carrion crow         | <i>Corvus corone</i>      | 1786 Sugiez  | FR  | Choana | neg.        | n.d. | n.d. | N/A            |
| 967C | Carrion crow         | <i>Corvus corone</i>      | 1786 Sugiez  | FR  | Choana | neg.        | n.d. | n.d. | N/A            |
| 967K | Carrion crow         | <i>Corvus corone</i>      | 1786 Sugiez  | FR  | Cloaca | neg.        | n.d. | n.d. | N/A            |
| 968C | Carrion crow         | <i>Corvus corone</i>      | 1786 Sugiez  | FR  | Choana | neg.        | n.d. | n.d. | N/A            |
| 968K | Carrion crow         | <i>Corvus corone</i>      | 1786 Sugiez  | FR  | Cloaca | neg.        | n.d. | n.d. | N/A            |
| 969C | Carrion crow         | <i>Corvus corone</i>      | 1786 Sugiez  | FR  | Choana | neg.        | n.d. | n.d. | N/A            |
| 969K | Carrion crow         | <i>Corvus corone</i>      | 1786 Sugiez  | FR  | Cloaca | neg.        | n.d. | n.d. | N/A            |
| 970C | Carrion crow         | <i>Corvus corone</i>      | 1786 Sugiez  | FR  | Choana | neg.        | n.d. | n.d. | N/A            |
| 970K | Carrion crow         | <i>Corvus corone</i>      | 1786 Sugiez  | FR  | Cloaca | neg.        | n.d. | n.d. | N/A            |
| 971C | Carrion crow         | <i>Corvus corone</i>      | 1786 Sugiez  | FR  | Choana | neg.        | n.d. | n.d. | N/A            |
| 971K | Carrion crow         | <i>Corvus corone</i>      | 1786 Sugiez  | FR  | Cloaca | neg.        | n.d. | n.d. | N/A            |
| 972C | Carrion crow         | <i>Corvus corone</i>      | 1786 Sugiez  | FR  | Choana | pos. (27.5) | neg. | neg. | C. psittaci 1V |
| 972K | Carrion crow         | <i>Corvus corone</i>      | 1786 Sugiez  | FR  | Cloaca | pos. (36.2) | neg. | neg. | Not identified |
| 973C | Eurasian sparrowhawk | <i>Accipiter nisus</i>    | 6703 Riviera | TI  | Choana | neg.        | n.d. | n.d. | N/A            |
| 973K | Eurasian sparrowhawk | <i>Accipiter nisus</i>    | 6703 Riviera | TI  | Cloaca | neg.        | n.d. | n.d. | N/A            |
| 974C | Eurasian sparrowhawk | <i>Accipiter nisus</i>    | Unknown      | N/A | Choana | neg.        | n.d. | n.d. | N/A            |
| 974K | Eurasian sparrowhawk | <i>Accipiter nisus</i>    | Unknown      | N/A | Cloaca | neg.        | n.d. | n.d. | N/A            |
| 975C | Northern goshawk     | <i>Accipiter gentilis</i> | 6702 Claro   | TI  | Choana | neg.        | n.d. | n.d. | N/A            |

|      |                        |                            |                 |     |        |      |      |      |     |
|------|------------------------|----------------------------|-----------------|-----|--------|------|------|------|-----|
| 975K | Northern goshawk       | <i>Accipiter gentilis</i>  | 6702 Claro      | TI  | Cloaca | neg. | n.d. | n.d. | N/A |
| 976C | Eurasian sparrowhawk   | <i>Accipiter nisus</i>     | 6710 Biasca     | TI  | Choana | neg. | n.d. | n.d. | N/A |
| 976K | Eurasian sparrowhawk   | <i>Accipiter nisus</i>     | 6710 Biasca     | TI  | Cloaca | neg. | n.d. | n.d. | N/A |
| 977C | Common buzzard         | <i>Buteo buteo</i>         | Unknown         | N/A | Choana | neg. | n.d. | n.d. | N/A |
| 977K | Common buzzard         | <i>Buteo buteo</i>         | Unknown         | N/A | Cloaca | neg. | n.d. | n.d. | N/A |
| 978C | European Honey-buzzard | <i>Pernis apivorus</i>     | 6514 Sementina  | TI  | Choana | neg. | n.d. | n.d. | N/A |
| 978K | European Honey-buzzard | <i>Pernis apivorus</i>     | 6514 Sementina  | TI  | Cloaca | neg. | n.d. | n.d. | N/A |
| 979C | Tawny owl              | <i>Strix aluco</i>         | 6760 Faido      | TI  | Choana | neg. | n.d. | n.d. | N/A |
| 979K | Tawny owl              | <i>Strix aluco</i>         | 6760 Faido      | TI  | Cloaca | neg. | n.d. | n.d. | N/A |
| 980C | Common kestrel         | <i>Falco tinnunculus</i>   | 6535 Roveredo   | GR  | Choana | neg. | n.d. | n.d. | N/A |
| 980K | Common kestrel         | <i>Falco tinnunculus</i>   | 6535 Roveredo   | GR  | Cloaca | neg. | n.d. | n.d. | N/A |
| 981C | Peregrine falcon       | <i>Falco peregrinus</i>    | 6512 Giubiasco  | TI  | Choana | neg. | n.d. | n.d. | N/A |
| 981K | Peregrine falcon       | <i>Falco peregrinus</i>    | 6512 Giubiasco  | TI  | Cloaca | neg. | n.d. | n.d. | N/A |
| 982C | Eurasian jay           | <i>Garrulus glandarius</i> | 3995 Ernen      | VS  | Choana | neg. | n.d. | n.d. | N/A |
| 982K | Eurasian jay           | <i>Garrulus glandarius</i> | 3995 Ernen      | VS  | Cloaca | neg. | n.d. | n.d. | N/A |
| 983C | Eurasian jay           | <i>Garrulus glandarius</i> | 3910 Saas Grund | VS  | Choana | neg. | n.d. | n.d. | N/A |
| 983K | Eurasian jay           | <i>Garrulus glandarius</i> | 3910 Saas Grund | VS  | Cloaca | neg. | n.d. | n.d. | N/A |
| 984K | Golden eagle           | <i>Aquila chrysaetos</i>   | 3911 Ried Brig  | VS  | Cloaca | neg. | n.d. | n.d. | N/A |
| 985C | Northern goshawk       | <i>Accipiter gentilis</i>  | 3984 Fiesch     | VS  | Choana | neg. | n.d. | n.d. | N/A |
| 985K | Northern goshawk       | <i>Accipiter gentilis</i>  | 3984 Fiesch     | VS  | Cloaca | neg. | n.d. | n.d. | N/A |
| 986C | Carrion crow           | <i>Corvus corone</i>       | 3995 Ernen      | VS  | Choana | neg. | n.d. | n.d. | N/A |
| 987C | Eurasian jay           | <i>Garrulus glandarius</i> | 3911 Ried Brig  | VS  | Choana | neg. | n.d. | n.d. | N/A |
| 987K | Eurasian jay           | <i>Garrulus glandarius</i> | 3911 Ried Brig  | VS  | Cloaca | neg. | n.d. | n.d. | N/A |
| 988C | Eurasian jay           | <i>Garrulus glandarius</i> | 3911 Ried Brig  | VS  | Choana | neg. | n.d. | n.d. | N/A |
| 989C | Eurasian sparrowhawk   | <i>Accipiter nisus</i>     | 3984 Fiesch     | VS  | Choana | neg. | n.d. | n.d. | N/A |
| 989K | Eurasian sparrowhawk   | <i>Accipiter nisus</i>     | 3984 Fiesch     | VS  | Cloaca | neg. | n.d. | n.d. | N/A |
| 990C | Carrion crow           | <i>Corvus corone</i>       | 3916 Ferden     | VS  | Choana | neg. | n.d. | n.d. | N/A |
| 990K | Carrion crow           | <i>Corvus corone</i>       | 3916 Ferden     | VS  | Cloaca | neg. | n.d. | n.d. | N/A |
| 991C | Eurasian magpie        | <i>Pica pica</i>           | 3911 Ried Brig  | VS  | Choana | neg. | n.d. | n.d. | N/A |
| 991K | Eurasian magpie        | <i>Pica pica</i>           | 3911 Ried Brig  | VS  | Cloaca | neg. | n.d. | n.d. | N/A |
| 992C | Eurasian jay           | <i>Garrulus glandarius</i> | 3995 Ernen      | VS  | Choana | neg. | n.d. | n.d. | N/A |
| 992K | Eurasian jay           | <i>Garrulus glandarius</i> | 3995 Ernen      | VS  | Cloaca | neg. | n.d. | n.d. | N/A |
| 993K | Carrion crow           | <i>Corvus corone</i>       | 1786 Sugiez     | FR  | Cloaca | neg. | n.d. | n.d. | N/A |
